# Supplementary material for: Self-reported side effects of COVID-19 vaccines among health professions students in India
Source: PeerJ. 2024 Apr 5;12:e17083. doi: 10.7717/peerj.17083 (PMC11000642; doi:10.7717/peerj.17083)
Supplement: Supplemental Information 1 [file peerj-12-17083-s001.xlsx]

## Sheet: Vaccine side-effects students -
1. Have you taken the vaccine?	2. Which vaccine have you taken?	3. Did you get COVID-19?	4. [If you were tested COVID-19 positive (RT-PCR or CT), please answer this question] When did you get the COVID-19?	5. Gender	6. Age (in years)	7. Please indicate your level of study:	7. Please indicate your current year:	8. Please indicate your current programme:	10. Do you have one or more chronic illness?	11. Did you notice any side-effects/adverse events after receiving your vaccine (1st dose)?	12. Did you notice any side-effects/adverse events after receiving your vaccine (1st dose)? Please select as many as apply. [Soreness of the injected arm]	12. Did you notice any side-effects/adverse events after receiving your vaccine (1st dose)? Please select as many as apply. [Soreness of my muscles all over]	12. Did you notice any side-effects/adverse events after receiving your vaccine (1st dose)? Please select as many as apply. [Fever (more than 99.5*F)]	12. Did you notice any side-effects/adverse events after receiving your vaccine (1st dose)? Please select as many as apply. [Headache]	12. Did you notice any side-effects/adverse events after receiving your vaccine (1st dose)? Please select as many as apply. [Trouble seeing/ double vision]	12. Did you notice any side-effects/adverse events after receiving your vaccine (1st dose)? Please select as many as apply. [Tiredness (more than usual)]	12. Did you notice any side-effects/adverse events after receiving your vaccine (1st dose)? Please select as many as apply. [Sleeping more than usual]	12. Did you notice any side-effects/adverse events after receiving your vaccine (1st dose)? Please select as many as apply. [Sleeping less than usual]	12. Did you notice any side-effects/adverse events after receiving your vaccine (1st dose)? Please select as many as apply. [Sleeping better than usual]	12. Did you notice any side-effects/adverse events after receiving your vaccine (1st dose)? Please select as many as apply. [I felt great!/ Had more energy]	12. Did you notice any side-effects/adverse events after receiving your vaccine (1st dose)? Please select as many as apply. [Feel less anxious]	12. Did you notice any side-effects/adverse events after receiving your vaccine (1st dose)? Please select as many as apply. [Swelling of the injected arm]	12. Did you notice any side-effects/adverse events after receiving your vaccine (1st dose)? Please select as many as apply. [Swelling all over/ I had an allergic reaction]	12. Did you notice any side-effects/adverse events after receiving your vaccine (1st dose)? Please select as many as apply. [Rash or itching over the injected arm]	12. Did you notice any side-effects/adverse events after receiving your vaccine (1st dose)? Please select as many as apply. [Abdominal pain]	12. Did you notice any side-effects/adverse events after receiving your vaccine (1st dose)? Please select as many as apply. [Diarrhoea]	12. Did you notice any side-effects/adverse events after receiving your vaccine (1st dose)? Please select as many as apply. [Nausea]	12. Did you notice any side-effects/adverse events after receiving your vaccine (1st dose)? Please select as many as apply. [Vomiting]	13. If you noticed any change after receiving the vaccine (1st dose), when did it start? [Soreness of the injected arm]	13. If you noticed any change after receiving the vaccine (1st dose), when did it start? [Soreness of my muscles all over]	13. If you noticed any change after receiving the vaccine (1st dose), when did it start? [Fever (more than 99.5*F)]	13. If you noticed any change after receiving the vaccine (1st dose), when did it start? [Headache]	13. If you noticed any change after receiving the vaccine (1st dose), when did it start? [Trouble seeing/ double vision]	13. If you noticed any change after receiving the vaccine (1st dose), when did it start? [Tiredness (more than usual)]	13. If you noticed any change after receiving the vaccine (1st dose), when did it start? [Sleeping more than usual]	13. If you noticed any change after receiving the vaccine (1st dose), when did it start? [Sleeping less than usual]	13. If you noticed any change after receiving the vaccine (1st dose), when did it start? [Sleeping better than usual]	13. If you noticed any change after receiving the vaccine (1st dose), when did it start? [I felt great!/ Had more energy]	13. If you noticed any change after receiving the vaccine (1st dose), when did it start? [Feel less anxious]	13. If you noticed any change after receiving the vaccine (1st dose), when did it start? [Swelling of the injected arm]	13. If you noticed any change after receiving the vaccine (1st dose), when did it start? [Swelling all over/ I had an allergic reaction]	13. If you noticed any change after receiving the vaccine (1st dose), when did it start? [Rash or itching over the injected arm]	13. If you noticed any change after receiving the vaccine (1st dose), when did it start? [Abdominal pain]	13. If you noticed any change after receiving the vaccine (1st dose), when did it start? [Diarrhoea]	13. If you noticed any change after receiving the vaccine (1st dose), when did it start? [Nausea]	13. If you noticed any change after receiving the vaccine (1st dose), when did it start? [Vomiting]	14. If you noticed a change after receiving the vaccine (1st dose), how long it lasted? [Soreness of the injected arm]	14. If you noticed a change after receiving the vaccine (1st dose), how long it lasted? [Soreness of my muscles all over]	14. If you noticed a change after receiving the vaccine (1st dose), how long it lasted? [Fever (more than 99.5*F)]
Not yet (PLEASE DISCONTINUE THE SURVEY)
Not yet (PLEASE DISCONTINUE THE SURVEY)
Not yet (PLEASE DISCONTINUE THE SURVEY)
Yes, only first dose	Covishield/Astrazeneca	No		Female	22	Undergraduate	Year 4	Medicine	No illness	Yes	Mild. I was still able to do most daily activities		Mild. I was still able to do most daily activities				Mild. I was still able to do most daily activities												4-7 days after		That same day																That same day		1-3 days
Yes, 1st and 2nd doses	Covishield/Astrazeneca	No		Male	18	Undergraduate	Year 1	Medicine	No illness	No (Please go to Question 17)
Yes, 1st and 2nd doses	Covishield/Astrazeneca	No		Female	27	Postgraduate	Year 2	Medicine	No illness	No (Please go to Question 17)
Yes, only first dose	Covishield/Astrazeneca	No		Female	18	Undergraduate	Year 1	Medicine	No illness	No (Please go to Question 17)
Yes, only first dose	Covaxin (India)	No		Female	18	Undergraduate	Year 1	Medicine	No illness	Yes	No	No	Moderate. I had to stop my daily activities	Severe! I had to seek medical attention	No	Mild. I was still able to do most daily activities	No	Moderate. I had to stop my daily activities	No	No	Not sure/	No	No	No	No	No	Mild. I was still able to do most daily activities	No	Not Experienced	Not Experienced	That same day	That same day	Not Experienced	That same day	Not Experienced	That same day	Not Experienced	Not Experienced	Not Experienced	Not Experienced	Not Experienced	Not Experienced	Not Experienced	Not Experienced	That same day	Not Experienced	Not Experienced	Not Experienced	1-3 days
Yes, 1st and 2nd doses	Covishield/Astrazeneca	Yes, tested positive (RT-PCR)	After the 2nd dose of vaccination	Male	27	Postgraduate	Year 1	Medicine	No illness;Obesity	No (Please go to Question 17)
Not yet (PLEASE DISCONTINUE THE SURVEY)
Not yet (PLEASE DISCONTINUE THE SURVEY)
Yes, only first dose	Covaxin (India)	Yes, tested positive (RT-PCR)	Before the 1st dose of vaccination	Female	22	Undergraduate	Yea 4	Medicine	No illness	No (Please go to Question 17)
Yes, only first dose	Covishield/Astrazeneca	No		Female	19	Undergraduate	Yea 4	Medicine	No illness	No (Please go to Question 17)
Yes, 1st and 2nd doses	Covishield/Astrazeneca	No		Female	22	Undergraduate	CRRI/Intern	Medicine	Asthma	Yes	Moderate. I had to stop my daily activities	Moderate. I had to stop my daily activities	Severe! I had to seek medical attention	Moderate. I had to stop my daily activities	Moderate. I had to stop my daily activities	Severe! I had to seek medical attention	Moderate. I had to stop my daily activities				Moderate. I had to stop my daily activities	Moderate. I had to stop my daily activities					Moderate. I had to stop my daily activities		That same day	1-3 days after	1-3 days after	1-3 days after	1-3 days after	That same day					That same day						1-3 days after		1-3 days	1-3 days	1-3 days
Yes, only first dose	Covaxin (India)	No		Female	22	Undergraduate	Yea 4	Medicine	No illness	Yes	Mild. I was still able to do most daily activities																		That same day																		Still present
Yes, 1st and 2nd doses	Covishield/Astrazeneca	No		Female	22	Undergraduate	CRRI/Intern	Medicine	Asthma	Yes	Moderate. I had to stop my daily activities	Moderate. I had to stop my daily activities	Severe! I had to seek medical attention	Moderate. I had to stop my daily activities	Moderate. I had to stop my daily activities	Severe! I had to seek medical attention	Moderate. I had to stop my daily activities				Moderate. I had to stop my daily activities	Moderate. I had to stop my daily activities					Moderate. I had to stop my daily activities		That same day	1-3 days after	1-3 days after	1-3 days after	1-3 days after	That same day					That same day						1-3 days after		1-3 days	1-3 days	1-3 days
Yes, only first dose	Covishield/Astrazeneca	No		Female	23	Undergraduate	Yea 4	Medicine	No illness	Yes	Mild. I was still able to do most daily activities	Mild. I was still able to do most daily activities	Not sure/	Not sure/	Not sure/	Mild. I was still able to do most daily activities	Mild. I was still able to do most daily activities	Not sure/	Not sure/	Not sure/	Not sure/	Not sure/	Not sure/	Not sure/	Not sure/	Not sure/	Not sure/	Not sure/	That same day	That same day	Not Experienced	Not Experienced	Not Experienced	That same day	That same day	Not Experienced	Not Experienced	Not Experienced	Not Experienced	Not Experienced	Not Experienced	Not Experienced	Not Experienced	Not Experienced	Not Experienced	Not Experienced	1-3 days	Not Experienced	Not Experienced
Yes, only first dose	Covishield/Astrazeneca	No		Female	24	Undergraduate	Yea 4	Medicine	Gastritis	Yes	Mild. I was still able to do most daily activities	Moderate. I had to stop my daily activities	Moderate. I had to stop my daily activities	Moderate. I had to stop my daily activities	Mild. I was still able to do most daily activities	Moderate. I had to stop my daily activities	Moderate. I had to stop my daily activities					Moderate. I had to stop my daily activities					Moderate. I had to stop my daily activities		That same day	That same day	That same day	That same day		That same day	That same day										That same day		1-3 days	1-3 days	1-3 days
Yes, only first dose	Covishield/Astrazeneca	No		Female	22	Undergraduate	Yea 4	Medicine	No illness	Yes	Moderate. I had to stop my daily activities	Moderate. I had to stop my daily activities	Moderate. I had to stop my daily activities	Moderate. I had to stop my daily activities	No	Moderate. I had to stop my daily activities	Moderate. I had to stop my daily activities	No	No	No	No	No	No	No	No	No	Mild. I was still able to do most daily activities	No	1-3 days after	1-3 days after	That same day	That same day	Not Experienced	That same day	That same day	Not Experienced	Not Experienced	Not Experienced	Not Experienced	Not Experienced	Not Experienced	Not Experienced	Not Experienced	Not Experienced	1-3 days after	Not Experienced	1-3 days	1-3 days	1-3 days
Not yet (PLEASE DISCONTINUE THE SURVEY)
Yes, 1st and 2nd doses	Covishield/Astrazeneca	No		Female	25	Postgraduate	Year 2	Medicine	No illness	Yes	Mild. I was still able to do most daily activities					Mild. I was still able to do most daily activities	Moderate. I had to stop my daily activities												That same day					That same day	That same day												1-3 days
Yes, only first dose	Covishield/Astrazeneca	No		Female	20	Undergraduate	Year 1	Medicine	No illness	No (Please go to Question 17)
Yes, only first dose	Covishield/Astrazeneca	No		Female	22	Undergraduate	Yea 4	Medicine	No illness	Yes	Moderate. I had to stop my daily activities	Moderate. I had to stop my daily activities	Severe! I had to seek medical attention	Moderate. I had to stop my daily activities	No	Moderate. I had to stop my daily activities	Moderate. I had to stop my daily activities	No	No	No	No	Mild. I was still able to do most daily activities	No	No	Not sure/	No	No	No	That same day	That same day	1-3 days after	1-3 days after	Not Experienced	That same day	That same day	Not Experienced	Not Experienced	4-7 days after	Not Experienced	1-3 days after	Not Experienced	Not Experienced	Not Experienced	Not Experienced	Not Experienced	Not Experienced	4-7 days	1-3 days	1-3 days
Yes, only first dose	Covishield/Astrazeneca	Yes, tested positive (RT-PCR)	Before the 1st dose of vaccination	Male	30	Postgraduate	Year 2	Medicine	No illness	Yes	Mild. I was still able to do most daily activities					Moderate. I had to stop my daily activities													1-3 days after					1-3 days after													1-3 days
Yes, only first dose	Covishield/Astrazeneca	No		Female	21yrs	Undergraduate	Yea 4	Medicine	No illness	No (Please go to Question 17)
Yes, only first dose	Covishield/Astrazeneca	No		Male	23	Undergraduate	Yea 4	Medicine	No illness	Yes	Mild. I was still able to do most daily activities	Not sure/	Severe! I had to seek medical attention	Severe! I had to seek medical attention	No	Mild. I was still able to do most daily activities	Mild. I was still able to do most daily activities	No	No	No	No	No	No	No	No	No	No	No	1-3 days after	1-3 days after	1-3 days after	1-3 days after															1-3 days	1-3 days
Yes, only first dose	Covishield/Astrazeneca	No		Female	21	Undergraduate	Yea 4	Medicine	Obesity;Pcod	No (Please go to Question 17)
Yes, only first dose	Covishield/Astrazeneca	No		Male	22	Undergraduate	CRRI/Intern	Medicine	No illness	Yes	Moderate. I had to stop my daily activities	Moderate. I had to stop my daily activities	Moderate. I had to stop my daily activities	Moderate. I had to stop my daily activities	Moderate. I had to stop my daily activities	Moderate. I had to stop my daily activities	Moderate. I had to stop my daily activities	Moderate. I had to stop my daily activities	No	Moderate. I had to stop my daily activities	Moderate. I had to stop my daily activities	Moderate. I had to stop my daily activities	Moderate. I had to stop my daily activities	Moderate. I had to stop my daily activities	Moderate. I had to stop my daily activities	Moderate. I had to stop my daily activities	Moderate. I had to stop my daily activities	Moderate. I had to stop my daily activities	That same day	That same day	That same day	That same day	That same day	That same day	That same day	That same day	That same day	That same day	That same day	That same day	That same day	That same day	That same day	That same day	That same day	That same day	1-3 days	1-3 days	1-3 days
Yes, only first dose	Covishield/Astrazeneca	No		Female	23	Undergraduate	Yea 4	Medicine	No illness	Yes	Mild. I was still able to do most daily activities	Not sure/	No	Moderate. I had to stop my daily activities	No	Moderate. I had to stop my daily activities	Moderate. I had to stop my daily activities	No	No	No	No	Mild. I was still able to do most daily activities	No	No	No	Not sure/	No	No	1-3 days after	Not Experienced	Not Experienced	That same day	Not Experienced	That same day	That same day	Not Experienced	Not Experienced	Not Experienced	Not Experienced	That same day	Not Experienced	Not Experienced	Not Experienced	That same day	Not Experienced	Not Experienced	1-3 days	Not Experienced	Not Experienced
Yes, only first dose	Covishield/Astrazeneca	No		Male	22	Undergraduate	CRRI/Intern	Medicine	No illness	Yes	Moderate. I had to stop my daily activities	Severe! I had to seek medical attention	Moderate. I had to stop my daily activities	Moderate. I had to stop my daily activities	No	Moderate. I had to stop my daily activities	No	Moderate. I had to stop my daily activities	No	No	Not sure/	No	No	No	No	No	No	No	That same day	That same day	That same day	That same day	Not Experienced	That same day	Not Experienced	That same day	Not Experienced	Not Experienced	Not Experienced	Not Experienced		Not Experienced	Not Experienced	Not Experienced	Not Experienced	Not Experienced	1-3 days	1-3 days	1-3 days
Yes, only first dose	Covishield/Astrazeneca	No		Male	20	Undergraduate	Year 2	Medicine	No illness	No (Please go to Question 17)
Yes, only first dose	Covishield/Astrazeneca	No		Male	20	Undergraduate	Year 2	Medicine	No illness	No (Please go to Question 17)
Not yet (PLEASE DISCONTINUE THE SURVEY)
Yes, 1st and 2nd doses	Covishield/Astrazeneca	No		Male	19	Undergraduate	Year 2	Medicine	Rhinitis	Yes			Mild. I was still able to do most daily activities																		That same day																		That same day
Yes, 1st and 2nd doses	Covishield/Astrazeneca	No		Male	30	Postgraduate	Year 1	Medicine	No illness	Yes	Mild. I was still able to do most daily activities	Mild. I was still able to do most daily activities	Not sure/	Mild. I was still able to do most daily activities	No	Mild. I was still able to do most daily activities	No	Mild. I was still able to do most daily activities	No	No	No	Not sure/	No	No	No	No	No	No	That same day	That same day	That same day	That same day	Not Experienced	That same day	Not Experienced	That same day	Not Experienced	Not Experienced	Not Experienced	Not Experienced	Not Experienced	Not Experienced	Not Experienced	Not Experienced	Not Experienced	Not Experienced	1-3 days	1-3 days	1-3 days
Yes, only first dose	Covishield/Astrazeneca	No		Female	19	Undergraduate	Year 1	Medicine	No illness	No (Please go to Question 17)
Yes, 1st and 2nd doses	Covishield/Astrazeneca	No		Male	27	Postgraduate	Year 3	Medicine	Diabetes;Hypertension	No (Please go to Question 17)
Yes, 1st and 2nd doses	Covishield/Astrazeneca	No		Female	20	Undergraduate	Year 2	Medicine	No illness	No (Please go to Question 17)
Yes, only first dose	Covishield/Astrazeneca	No		Male	19	Undergraduate	Year 2	Medicine	No illness	Yes	Moderate. I had to stop my daily activities	Mild. I was still able to do most daily activities	Moderate. I had to stop my daily activities	Moderate. I had to stop my daily activities	Not sure/	Moderate. I had to stop my daily activities	Moderate. I had to stop my daily activities	No	No	No	Not sure/	Not sure/	No	No	No	No	No	No	1-3 days after	1-3 days after	1-3 days after	1-3 days after	Not Experienced	1-3 days after	1-3 days after	Not Experienced	Not Experienced	Not Experienced	Not Experienced	Not Experienced	Not Experienced	Not Experienced	Not Experienced	Not Experienced	Not Experienced	Not Experienced	4-7 days	Not Experienced	1-3 days
Not yet (PLEASE DISCONTINUE THE SURVEY)
Not yet (PLEASE DISCONTINUE THE SURVEY)
Yes, only first dose	Covaxin (India)	No		Female	23	Undergraduate	Yea 4	Medicine	No illness	No (Please go to Question 17)
Yes, 1st and 2nd doses	Covishield/Astrazeneca	No		Female	19	Undergraduate	Year 2	Medicine	No illness	Yes	Severe! I had to seek medical attention	No	Mild. I was still able to do most daily activities	Mild. I was still able to do most daily activities	No	Mild. I was still able to do most daily activities	Moderate. I had to stop my daily activities	No	No	No	No	No	No	No	No	No	No	No	That same day	Not Experienced	1-3 days after	1-3 days after	Not Experienced	That same day	That same day	Not Experienced	Not Experienced	Not Experienced	Not Experienced	Not Experienced	Not Experienced	Not Experienced	Not Experienced	Not Experienced	Not Experienced	Not Experienced	1-3 days	Not Experienced	1-3 days
Yes, only first dose	Covishield/Astrazeneca	No		Male	19	Undergraduate	Year 1	Medicine	No illness	No (Please go to Question 17)
Yes, only first dose	Covaxin (India)	Yes, tested positive (CT)	Before the 1st dose of vaccination	Male	19	Undergraduate	Year 1	Medicine	No illness	No (Please go to Question 17)
Not yet (PLEASE DISCONTINUE THE SURVEY)
Yes, only first dose	Covishield/Astrazeneca	Yes, never tested (symptomatic)		Male	23	Undergraduate	Yea 4	Medicine	No illness	Yes	Moderate. I had to stop my daily activities	Moderate. I had to stop my daily activities	Moderate. I had to stop my daily activities	Moderate. I had to stop my daily activities	No	Mild. I was still able to do most daily activities	Not sure/	Not sure/	Not sure/	Not sure/	Not sure/	Mild. I was still able to do most daily activities	No	No	No	No	No	No	1-3 days after	1-3 days after	1-3 days after	1-3 days after	Not Experienced	1-3 days after	Not Experienced	Not Experienced	Not Experienced	Not Experienced	Not Experienced	Not Experienced	Not Experienced	Not Experienced	Not Experienced	Not Experienced	Not Experienced	Not Experienced	1-3 days	1-3 days	1-3 days
Yes, 1st and 2nd doses	Covishield/Astrazeneca	No		Female	24	Postgraduate	Year 1	Medicine	No illness	No (Please go to Question 17)
Not yet (PLEASE DISCONTINUE THE SURVEY)
Not yet (PLEASE DISCONTINUE THE SURVEY)
Yes, only first dose	Covishield/Astrazeneca	Yes, tested positive (RT-PCR)	Before the 1st dose of vaccination	Male	28	Postgraduate		Medicine	No illness	No (Please go to Question 17)
Yes, only first dose	Covaxin (India)	Yes, never tested (symptomatic)	Before the 1st dose of vaccination	Female	22	Undergraduate	CRRI/Intern	Medicine	No illness	Yes				Moderate. I had to stop my daily activities		Moderate. I had to stop my daily activities			Mild. I was still able to do most daily activities	Mild. I was still able to do most daily activities												1-3 days after
Yes, only first dose	Covishield/Astrazeneca	No		Female	21	Undergraduate	Yea 4	Medicine	Obesity;Pcod	No (Please go to Question 17)
Yes, 1st and 2nd doses	Covishield/Astrazeneca	No		Male	30	Postgraduate	Year 1	Medicine	No illness	Yes	Mild. I was still able to do most daily activities	Mild. I was still able to do most daily activities	Not sure/	Mild. I was still able to do most daily activities	No	Mild. I was still able to do most daily activities	No	Mild. I was still able to do most daily activities	No	No	No	Not sure/	No	No	No	No	No	No	That same day	That same day	That same day	That same day	Not Experienced	That same day	Not Experienced	That same day	Not Experienced	Not Experienced	Not Experienced	Not Experienced	Not Experienced	Not Experienced	Not Experienced	Not Experienced	Not Experienced	Not Experienced	1-3 days	1-3 days	1-3 days
Yes, only first dose	Covishield/Astrazeneca	No		Female	21	Undergraduate	Yea 4	Medicine	Obesity;Pcod	No (Please go to Question 17)
Yes, only first dose	Covishield/Astrazeneca	No		Female	21	Undergraduate	Yea 4	Medicine	Obesity;Pcod	No (Please go to Question 17)
Yes, only first dose	Covaxin (India)	Yes, tested positive (RT-PCR)	Before the 1st dose of vaccination	Female	23	Undergraduate	CRRI/Intern	Medicine	No illness	No (Please go to Question 17)
Yes, only first dose	Covishield/Astrazeneca	No		Female	23	Undergraduate	Yea 4	Medicine	No illness	No (Please go to Question 17)
Yes, 1st and 2nd doses	Covishield/Astrazeneca	No		Female	22	Undergraduate	CRRI/Intern	Medicine	Asthma	Yes	Moderate. I had to stop my daily activities	Moderate. I had to stop my daily activities	Severe! I had to seek medical attention	Moderate. I had to stop my daily activities	Moderate. I had to stop my daily activities	Severe! I had to seek medical attention	Moderate. I had to stop my daily activities				Moderate. I had to stop my daily activities	Moderate. I had to stop my daily activities					Moderate. I had to stop my daily activities		That same day	1-3 days after	1-3 days after	1-3 days after	1-3 days after	That same day					That same day						1-3 days after		1-3 days	1-3 days	1-3 days
Yes, only first dose	Covishield/Astrazeneca	No		Female	21	Undergraduate	Yea 4	Medicine	Obesity;Pcod	No (Please go to Question 17)
Yes, 1st and 2nd doses	Covishield/Astrazeneca	No		Female	22	Undergraduate	CRRI/Intern	Medicine	Asthma	Yes	Moderate. I had to stop my daily activities	Moderate. I had to stop my daily activities	Severe! I had to seek medical attention	Moderate. I had to stop my daily activities	Moderate. I had to stop my daily activities	Severe! I had to seek medical attention	Moderate. I had to stop my daily activities				Moderate. I had to stop my daily activities	Moderate. I had to stop my daily activities					Moderate. I had to stop my daily activities		That same day	1-3 days after	1-3 days after	1-3 days after	1-3 days after	That same day					That same day						1-3 days after		1-3 days	1-3 days	1-3 days
Yes, 1st and 2nd doses	Covishield/Astrazeneca	No		Male	35		Other	Medicine	No illness	Yes	Mild. I was still able to do most daily activities	Mild. I was still able to do most daily activities	Severe! I had to seek medical attention	Moderate. I had to stop my daily activities	No	Mild. I was still able to do most daily activities	Not sure/	Not sure/	Not sure/	Not sure/	Not sure/	Mild. I was still able to do most daily activities	No	No	No	No	Not sure/	No	That same day	1-3 days after	That same day	That same day	Not Experienced	Not Experienced	Not Experienced	Not Experienced	Not Experienced	Not Experienced	Not Experienced	Not Experienced	Not Experienced	Not Experienced		Not Experienced	That same day	Not Experienced	1-3 days	1-3 days	That same day
Yes, only first dose	Covaxin (India)	Yes, tested positive (RT-PCR)	Before the 1st dose of vaccination	Female	22	Undergraduate	Yea 4	Medicine	No illness	No (Please go to Question 17)
Yes, 1st and 2nd doses	Covishield/Astrazeneca	No		Male	40	Postgraduate	CRRI/Intern	Dentistry	No illness	No (Please go to Question 17)
Yes, only first dose	Covishield/Astrazeneca	No		Female	23	Undergraduate	Yea 4	Medicine	No illness	Yes	No	No	No	Moderate. I had to stop my daily activities	Not sure/	Moderate. I had to stop my daily activities	Moderate. I had to stop my daily activities	No	No	No	No	No	No	No	No	No	No	No	Not Experienced	Not Experienced	Not Experienced	That same day	Not Experienced	1-3 days after	1-3 days after	Not Experienced	Not Experienced	Not Experienced	Not Experienced	Not Experienced	Not Experienced	Not Experienced	Not Experienced	Not Experienced	Not Experienced	Not Experienced	Not Experienced	Not Experienced	Not Experienced
Not yet (PLEASE DISCONTINUE THE SURVEY)
Not yet (PLEASE DISCONTINUE THE SURVEY)
Not yet (PLEASE DISCONTINUE THE SURVEY)
Yes, only first dose	Covishield/Astrazeneca	No		Male	22	Undergraduate	Year 2	Medicine	No illness	No (Please go to Question 17)
Yes, only first dose	Covishield/Astrazeneca	Yes, never tested (symptomatic)	Before the 1st dose of vaccination	Female	21	Undergraduate	Year 2	Medicine	No illness	Yes	Moderate. I had to stop my daily activities	Mild. I was still able to do most daily activities	Mild. I was still able to do most daily activities	Moderate. I had to stop my daily activities		Moderate. I had to stop my daily activities	Moderate. I had to stop my daily activities								Moderate. I had to stop my daily activities				That same day	That same day	1-3 days after	1-3 days after			1-3 days after								1-3 days after				1-3 days	1-3 days	1-3 days
Yes, only first dose	Covishield/Astrazeneca	No		Male	20	Undergraduate	Year 2	Medicine	No illness	Yes	Moderate. I had to stop my daily activities	Moderate. I had to stop my daily activities	Severe! I had to seek medical attention	Severe! I had to seek medical attention		Moderate. I had to stop my daily activities		Moderate. I had to stop my daily activities		Moderate. I had to stop my daily activities	Moderate. I had to stop my daily activities	Moderate. I had to stop my daily activities							That same day	That same day	That same day	That same day		That same day		That same day				1-3 days after							1-3 days	1-3 days	1-3 days
Not yet (PLEASE DISCONTINUE THE SURVEY)
Not yet (PLEASE DISCONTINUE THE SURVEY)
Yes, only first dose	Covishield/Astrazeneca	No		Female	19	Undergraduate	Year 2	Medicine	No illness	Yes	Moderate. I had to stop my daily activities	Moderate. I had to stop my daily activities	Severe! I had to seek medical attention	Severe! I had to seek medical attention	Mild. I was still able to do most daily activities	Severe! I had to seek medical attention	Severe! I had to seek medical attention										Severe! I had to seek medical attention		That same day	That same day	That same day	That same day	That same day	That same day	That same day										That same day		1-3 days	1-3 days
Yes, only first dose	Covishield/Astrazeneca	No		Female	21	Undergraduate	Year 2	Medicine	No illness	No (Please go to Question 17)
Yes, 1st and 2nd doses	Covishield/Astrazeneca	No		Male	40	Postgraduate	Assistant professor	Forensic Medicine	No illness	Yes	Mild. I was still able to do most daily activities	No	Not sure/	Mild. I was still able to do most daily activities	No	Mild. I was still able to do most daily activities	No	No	No	Mild. I was still able to do most daily activities	Not sure/	Not sure/	No	No	No	No	No	No	That same day	Not Experienced	That same day	That same day	Not Experienced			Not Experienced	Not Experienced	That same day	That same day		Not Experienced	Not Experienced	Not Experienced	Not Experienced	Not Experienced		That same day	Not Experienced	That same day
Yes, only first dose	Covishield/Astrazeneca	No		Female	21	Undergraduate	Year 2	Medicine	No illness	Yes	Moderate. I had to stop my daily activities	Mild. I was still able to do most daily activities	Moderate. I had to stop my daily activities	No	No	Moderate. I had to stop my daily activities	Moderate. I had to stop my daily activities	No	No	No	No	Mild. I was still able to do most daily activities	No	No	No	No	Mild. I was still able to do most daily activities	No	That same day	That same day	That same day	Not Experienced	Not Experienced	That same day	That same day	Not Experienced	Not Experienced	Not Experienced	Not Experienced	That same day	Not Experienced	Not Experienced	Not Experienced	Not Experienced	That same day	Not Experienced	1-3 days		1-3 days
Not yet (PLEASE DISCONTINUE THE SURVEY)
Yes, only first dose	Covishield/Astrazeneca	No		Male	22	Undergraduate	Year 2	Medicine	Asthma	No (Please go to Question 17)
Yes, only first dose	Covishield/Astrazeneca	No		Female	20	Undergraduate	Year 2	Medicine	No illness	No (Please go to Question 17)
Not yet (PLEASE DISCONTINUE THE SURVEY)
Not yet (PLEASE DISCONTINUE THE SURVEY)
Yes, only first dose	Covishield/Astrazeneca	No		Female	23	Undergraduate	Year 2	Medicine	No illness	No (Please go to Question 17)
Yes, only first dose	Covishield/Astrazeneca	No		Female	20	Undergraduate	Year 2	Medicine	No illness	No (Please go to Question 17)
Yes, only first dose	Covishield/Astrazeneca	No		Male	20	Undergraduate	Year 2	Medicine	No illness	No (Please go to Question 17)
Yes, only first dose	Covishield/Astrazeneca	Yes, never tested (symptomatic)		Male	23	Undergraduate	Year 2	Medicine	No illness;Diabetes	No (Please go to Question 17)
Not yet (PLEASE DISCONTINUE THE SURVEY)
Yes, only first dose	Covishield/Astrazeneca	No		Female	20	Undergraduate	Year 2	Medicine	No illness	No (Please go to Question 17)
Not yet (PLEASE DISCONTINUE THE SURVEY)
Yes, only first dose	Covishield/Astrazeneca	No		Female	20	Undergraduate	Year 2	Medicine	No illness	Yes	Moderate. I had to stop my daily activities	Moderate. I had to stop my daily activities	Severe! I had to seek medical attention	Severe! I had to seek medical attention	No	Moderate. I had to stop my daily activities	Mild. I was still able to do most daily activities	No	No	No	No	Moderate. I had to stop my daily activities	No	No	No	No	Moderate. I had to stop my daily activities	Moderate. I had to stop my daily activities	That same day	That same day	That same day	That same day	Not Experienced	4-7 days after	That same day	Not Experienced	Not Experienced	Not Experienced	Not Experienced	That same day	Not Experienced	Not Experienced	Not Experienced	Not Experienced	That same day	That same day	4-7 days	4-7 days	4-7 days
Yes, only first dose	Covishield/Astrazeneca	No		Male	20	Undergraduate	Year 2	Medicine	No illness	Yes	Mild. I was still able to do most daily activities	Mild. I was still able to do most daily activities	No	No	No	No	Moderate. I had to stop my daily activities	No	Mild. I was still able to do most daily activities	No	No	No	No	No	No	No	No	No	1-3 days after	That same day	Not Experienced	Not Experienced	Not Experienced	That same day	That same day	Not Experienced	That same day	That same day	Not Experienced	Not Experienced	Not Experienced	Not Experienced	Not Experienced	Not Experienced	Not Experienced	Not Experienced	That same day	1-3 days	Not Experienced
Not yet (PLEASE DISCONTINUE THE SURVEY)
Yes, only first dose	Covishield/Astrazeneca	No		Male	21	Undergraduate	Year 2	Medicine	No illness	Yes			Moderate. I had to stop my daily activities	Moderate. I had to stop my daily activities		Moderate. I had to stop my daily activities		Moderate. I had to stop my daily activities													That same day	That same day		That same day															That same day
Yes, only first dose	Covishield/Astrazeneca	No		Female	21	Undergraduate	Year 2	Medicine	No illness	Yes	Moderate. I had to stop my daily activities		Mild. I was still able to do most daily activities			Mild. I was still able to do most daily activities	Moderate. I had to stop my daily activities												That same day		1-3 days after			1-3 days after	1-3 days after												1-3 days		1-3 days
Yes, only first dose	Covishield/Astrazeneca	No		Female	20	Undergraduate	Year 2	Medicine	No illness	Yes	Mild. I was still able to do most daily activities			Mild. I was still able to do most daily activities		Mild. I was still able to do most daily activities	Mild. I was still able to do most daily activities												That same day		That same day	That same day		1-3 days after	1-3 days after												1-3 days
Yes, only first dose	Covishield/Astrazeneca	Yes, tested positive (RT-PCR)	Between 1st dose and 2nd dose of vaccination	Female	21	Undergraduate	Year 2	Medicine	No illness	No (Please go to Question 17)
Yes, only first dose	Covishield/Astrazeneca	No		Male	21	Undergraduate	Year 2	Medicine	No illness	No (Please go to Question 17)
Yes, only first dose	Covishield/Astrazeneca	No		Female	22	Undergraduate	Year 2	Medicine	No illness	Yes	Moderate. I had to stop my daily activities			Moderate. I had to stop my daily activities															That same day			That same day															1-3 days
Yes, only first dose	Covishield/Astrazeneca	No		Male	22	Undergraduate	Year 2	Medicine	No illness	No (Please go to Question 17)
Yes, only first dose	Covishield/Astrazeneca	No		Male	22	Undergraduate	Year 2	Medicine	No illness	Yes																			4-7 days after																4-7 days after
Yes, only first dose	Covishield/Astrazeneca	No		Male	20	Undergraduate	Year 2	Medicine	No illness	No (Please go to Question 17)
Yes, only first dose	Covishield/Astrazeneca	No		Female	20	Undergraduate	Year 1	Medicine	No illness	No (Please go to Question 17)
Yes, only first dose	Covishield/Astrazeneca	No		Male	22	Undergraduate	Year 2	Medicine		Yes	Moderate. I had to stop my daily activities	No	No	No	No	No	No	No	No	No	No	No	No	No	No	No	No	No	1-3 days after	Not Experienced	Not Experienced	Not Experienced	Not Experienced	Not Experienced	Not Experienced	Not Experienced	Not Experienced	Not Experienced	Not Experienced	Not Experienced	Not Experienced	Not Experienced	Not Experienced	Not Experienced	Not Experienced	Not Experienced	1-3 days	Still present	Still present
Yes, only first dose	Covaxin (India)	No		Female	22	Postgraduate	Year 2	Medicine	No illness	Yes	No	No	Mild. I was still able to do most daily activities	No	No	No	Mild. I was still able to do most daily activities	No	No	No	No		No	No	No	No	No	No	Not Experienced	Not Experienced	1-3 days after	Not Experienced	Not Experienced		Not Experienced	Not Experienced	Not Experienced	Not Experienced	Not Experienced	Not Experienced	Not Experienced	Not Experienced	Not Experienced	Not Experienced	Not Experienced	Not Experienced	Not Experienced	Not Experienced	1-3 days
Not yet (PLEASE DISCONTINUE THE SURVEY)
Yes, only first dose	Covishield/Astrazeneca	No		Male	21	Undergraduate	Year 2	Medicine	No illness	No (Please go to Question 17)
Yes, only first dose	Covaxin (India)	No		Female	21	Undergraduate	Year 2	Medicine	No illness	No (Please go to Question 17)
Yes, only first dose	Covishield/Astrazeneca	No		Male	20	Undergraduate	Year 2	Medicine	No illness	Yes	Mild. I was still able to do most daily activities	Mild. I was still able to do most daily activities	No	No	No	No	Moderate. I had to stop my daily activities	No	Mild. I was still able to do most daily activities	No	No	No	No	No	No	No	No	No	1-3 days after	That same day	Not Experienced	Not Experienced	Not Experienced	That same day	That same day	Not Experienced	That same day	That same day	Not Experienced	Not Experienced	Not Experienced	Not Experienced	Not Experienced	Not Experienced	Not Experienced	Not Experienced	That same day	1-3 days	Not Experienced
Not yet (PLEASE DISCONTINUE THE SURVEY)
Yes, only first dose	Covishield/Astrazeneca	No		Male	22	Undergraduate	Year 2	Medicine	No illness	No (Please go to Question 17)
Yes, only first dose	Covishield/Astrazeneca	No	Before the 1st dose of vaccination	Female	22	Undergraduate	Year 2	Medicine		No (Please go to Question 17)
Yes, only first dose	Covishield/Astrazeneca	No		Male	22	Undergraduate	Year 2	Medicine	No illness	No (Please go to Question 17)
Yes, only first dose	Covishield/Astrazeneca	No		Female	19 yrs	Undergraduate	Year 2	Medicine	No illness	No (Please go to Question 17)
Yes, only first dose	Covishield/Astrazeneca	No		Female	24	Undergraduate	Year 2	Medicine	No illness	No (Please go to Question 17)
Yes, only first dose	Covaxin (India)	Yes, tested positive (RT-PCR)	Before the 1st dose of vaccination	Male	24	Undergraduate	Year 2	Medicine	No illness	No (Please go to Question 17)
Yes, only first dose	Covishield/Astrazeneca	No		Male	19	Undergraduate	Year 2	Medicine	No illness	No (Please go to Question 17)
Yes, only first dose	Covishield/Astrazeneca	No		Female	21		Year 2	Pharmacy	No illness	Yes	Moderate. I had to stop my daily activities	Moderate. I had to stop my daily activities	Moderate. I had to stop my daily activities	Moderate. I had to stop my daily activities	No	Moderate. I had to stop my daily activities	Moderate. I had to stop my daily activities	No	No	No	No	Mild. I was still able to do most daily activities	Mild. I was still able to do most daily activities	Not sure/	No	No		No	That same day	That same day	That same day	That same day		That same day	4-7 days after	4-7 days after	4-7 days after	4-7 days after	4-7 days after	That same day	That same day	4-7 days after	4-7 days after	4-7 days after	1-3 days after	4-7 days after	1-3 days	1-3 days	1-3 days
Yes, only first dose	Covishield/Astrazeneca	No		Female	21		Year 2	Medicine	No illness	No (Please go to Question 17)
Not yet (PLEASE DISCONTINUE THE SURVEY)
Yes, only first dose	Covishield/Astrazeneca	No	Before the 1st dose of vaccination	Male	23	Undergraduate	Year 2	Medicine	No illness	No (Please go to Question 17)
Yes, only first dose	Covishield/Astrazeneca	No		Female	21	Undergraduate	Year 2	Medicine	No illness	No (Please go to Question 17)
Yes, only first dose	Covishield/Astrazeneca	No		Male	22	Undergraduate	Year 2	Medicine	No illness	No (Please go to Question 17)
Not yet (PLEASE DISCONTINUE THE SURVEY)
Not yet (PLEASE DISCONTINUE THE SURVEY)
Yes, only first dose	Covishield/Astrazeneca	No		Male	20	Undergraduate	Year 2	Medicine	No illness	No (Please go to Question 17)
Not yet (PLEASE DISCONTINUE THE SURVEY)
Yes, only first dose	Covishield/Astrazeneca	No		Female	21 years	Undergraduate	Year 2	Student	No illness	No (Please go to Question 17)
Yes, only first dose	Covishield/Astrazeneca	No		Female	20	Undergraduate	Year 2	Medicine	No illness	Yes	Mild. I was still able to do most daily activities	Mild. I was still able to do most daily activities	No	No	No	No	No	No	No	No	No	No	No	No	No	No	No	No	That same day	That same day	Not Experienced	Not Experienced	Not Experienced	Not Experienced	Not Experienced	Not Experienced	Not Experienced	Not Experienced	Not Experienced	Not Experienced	Not Experienced	Not Experienced	Not Experienced	Not Experienced	Not Experienced	Not Experienced	1-3 days	1-3 days	Not Experienced
Yes, only first dose	Covishield/Astrazeneca	No		Female	22	Undergraduate	Year 2	Medicine	No illness	Yes			Mild. I was still able to do most daily activities	Mild. I was still able to do most daily activities																	That same day	That same day																	That same day
Yes, only first dose	Covishield/Astrazeneca	No		Male	20	Undergraduate	Year 2	Medicine	No illness	Yes	Mild. I was still able to do most daily activities		Moderate. I had to stop my daily activities	Mild. I was still able to do most daily activities		Mild. I was still able to do most daily activities	Moderate. I had to stop my daily activities												That same day		That same day	That same day		That same day	1-3 days after												That same day		1-3 days
Yes, only first dose	Covishield/Astrazeneca	No		Female	20	Undergraduate	Year 2	Medicine	No illness	No (Please go to Question 17)
Not yet (PLEASE DISCONTINUE THE SURVEY)
Not yet (PLEASE DISCONTINUE THE SURVEY)
Yes, only first dose	Covaxin (India)	No		Male	22	Undergraduate	Year 2	Medicine	No illness	No (Please go to Question 17)
Yes, only first dose	Covishield/Astrazeneca	No		Female	19	Undergraduate	Year 2	Medicine	No illness	Yes	Mild. I was still able to do most daily activities			Mild. I was still able to do most daily activities		Moderate. I had to stop my daily activities													That same day			That same day		That same day
Yes, only first dose	Covishield/Astrazeneca	No		Female	22	Undergraduate	Year 2	Medicine	No illness	Yes	Moderate. I had to stop my daily activities	Moderate. I had to stop my daily activities	Moderate. I had to stop my daily activities	Moderate. I had to stop my daily activities	No	Mild. I was still able to do most daily activities	No	Mild. I was still able to do most daily activities	No	No	No	Mild. I was still able to do most daily activities	Mild. I was still able to do most daily activities	Moderate. I had to stop my daily activities	Mild. I was still able to do most daily activities	No	Moderate. I had to stop my daily activities	Moderate. I had to stop my daily activities	1-3 days after	1-3 days after	That same day	1-3 days after	Not Experienced	1-3 days after	Not Experienced	Not Experienced	Not Experienced	Not Experienced	Not Experienced	1-3 days after	1-3 days after	That same day	4-7 days after	Not Experienced	That same day	That same day	1-3 days	1-3 days	That same day
Yes, only first dose	Covishield/Astrazeneca	No		Male	20		Year 2	Medicine	No illness	No (Please go to Question 17)
Yes, only first dose	Covishield/Astrazeneca	No		Female	19	Undergraduate	Year 2	Medicine	No illness	No (Please go to Question 17)
Yes, only first dose	Covaxin (India)	No		Male	22	Undergraduate	Year 2	Medicine	No illness	No (Please go to Question 17)
Yes, only first dose	Covishield/Astrazeneca	No		Female	20	Undergraduate	Year 2	Medicine	No illness	Yes	Moderate. I had to stop my daily activities	No	No	No	No	Moderate. I had to stop my daily activities	Moderate. I had to stop my daily activities	No	No	No	No	Moderate. I had to stop my daily activities	No	No	No	No	No	No	That same day	Not Experienced	Not Experienced	Not Experienced	Not Experienced	That same day	That same day	Not Experienced	Not Experienced	Not Experienced	Not Experienced	That same day		Not Experienced	Not Experienced	Not Experienced	Not Experienced	Not Experienced	That same day	Not Experienced	Not Experienced
Yes, only first dose	Covishield/Astrazeneca	No		Male	20	Undergraduate	Year 2	Medicine	No illness	Yes	Mild. I was still able to do most daily activities	Mild. I was still able to do most daily activities	No	No	No	No	Moderate. I had to stop my daily activities	No	Mild. I was still able to do most daily activities	No	No	No	No	No	No	No	No	No	1-3 days after	That same day	Not Experienced	Not Experienced	Not Experienced	That same day	That same day	Not Experienced	That same day	That same day	Not Experienced	Not Experienced	Not Experienced	Not Experienced	Not Experienced	Not Experienced	Not Experienced	Not Experienced	That same day	1-3 days	Not Experienced
Yes, only first dose	Covishield/Astrazeneca	No		Male	21	Undergraduate	Year 1	Medicine	No illness	No (Please go to Question 17)
Yes, only first dose	Covishield/Astrazeneca	No		Female	18	Undergraduate	Year 1	Medicine	No illness	No (Please go to Question 17)
Not yet (PLEASE DISCONTINUE THE SURVEY)
Yes, only first dose	Covishield/Astrazeneca	Yes, tested positive (RT-PCR)	Between 1st dose and 2nd dose of vaccination	Male	21	Undergraduate	Year 1	Medicine	No illness	No (Please go to Question 17)
Yes, only first dose	Covishield/Astrazeneca	No		Female	20	Undergraduate	Year 1	Medicine	No illness	Yes	Mild. I was still able to do most daily activities	Mild. I was still able to do most daily activities		Mild. I was still able to do most daily activities		Mild. I was still able to do most daily activities										Mild. I was still able to do most daily activities	Mild. I was still able to do most daily activities		That same day	That same day	That same day	That same day												That same day	That same day		1-3 days	1-3 days	1-3 days
Yes, only first dose	Covishield/Astrazeneca	No		Female	21	Undergraduate	Year 1	Medicine	No illness	Yes	Mild. I was still able to do most daily activities	Mild. I was still able to do most daily activities	Moderate. I had to stop my daily activities	Moderate. I had to stop my daily activities	No	Mild. I was still able to do most daily activities	Moderate. I had to stop my daily activities	No	No	No	No	Mild. I was still able to do most daily activities	No	No	No	No	Mild. I was still able to do most daily activities	Moderate. I had to stop my daily activities	1-3 days after	1-3 days after	That same day	1-3 days after	Not Experienced	1-3 days after	1-3 days after	Not Experienced	Not Experienced	Not Experienced	Not Experienced	1-3 days after	Not Experienced	Not Experienced	Not Experienced	Not Experienced	1-3 days after	1-3 days after	1-3 days	1-3 days	1-3 days
Yes, only first dose	Covishield/Astrazeneca	No		Female	20	Undergraduate	Year 1	Medicine	No illness	No (Please go to Question 17)
Yes, only first dose	Covishield/Astrazeneca	No		Male	19	Undergraduate	Year 1	Medicine	No illness	No (Please go to Question 17)
Yes, only first dose	Covishield/Astrazeneca	No		Female	19	Undergraduate	Year 1	Medicine	No illness	Yes	Mild. I was still able to do most daily activities	No	Severe! I had to seek medical attention	Mild. I was still able to do most daily activities	No	Not sure/	Not sure/	Not sure/	Not sure/	Not sure/	Not sure/	Not sure/	Not sure/	Not sure/	Not sure/	Not sure/	Not sure/	Not sure/	That same day	Not Experienced	That same day	That same day	Not Experienced	That same day	Not Experienced	Not Experienced	Not Experienced	Not Experienced	Not Experienced	Not Experienced	Not Experienced	Not Experienced	Not Experienced	Not Experienced	Not Experienced	Not Experienced	That same day	Still present	That same day
Yes, only first dose	Covishield/Astrazeneca	No		Female	20	Undergraduate	Year 1	Medicine	No illness	No (Please go to Question 17)
Yes, only first dose	Covishield/Astrazeneca	No		Male	21	Undergraduate	Year 1	Medicine	No illness	Yes	Not sure/	Not sure/	Moderate. I had to stop my daily activities	Mild. I was still able to do most daily activities	No	Moderate. I had to stop my daily activities	Not sure/	Not sure/	Not sure/	No	No	Not sure/	Not sure/	No	No	No	Not sure/	No	Not Experienced	Not Experienced	That same day	Not Experienced	Not Experienced	1-3 days after	Not Experienced	Not Experienced	Not Experienced	Not Experienced	Not Experienced	Not Experienced	Not Experienced	Not Experienced	Not Experienced	Not Experienced	1-3 days after	Not Experienced	Not Experienced	Not Experienced	1-3 days
Yes, only first dose	Covishield/Astrazeneca	No		Female	20	Undergraduate	Year 1	Medicine	No illness	No (Please go to Question 17)
Not yet (PLEASE DISCONTINUE THE SURVEY)
Yes, only first dose	Covishield/Astrazeneca	No		Female	20	Undergraduate	Year 1	Medicine	No illness	Yes	Mild. I was still able to do most daily activities	No	Mild. I was still able to do most daily activities	No	No	Mild. I was still able to do most daily activities	Mild. I was still able to do most daily activities	No	Not sure/	Mild. I was still able to do most daily activities	No	Mild. I was still able to do most daily activities	No	No	No	No	No	No	1-3 days after	1-3 days after	1-3 days after		Not Experienced	1-3 days after	1-3 days after	Not Experienced	Not Experienced	Not Experienced	Not Experienced	1-3 days after	Not Experienced	Not Experienced	Not Experienced	Not Experienced	Not Experienced	Not Experienced	1-3 days	Not Experienced	4-7 days
Yes, only first dose	Covaxin (India)	Yes, never tested (symptomatic)		Female	20	Undergraduate	Year 1	MBBS 1st	No illness	No (Please go to Question 17)
Yes, only first dose	Covishield/Astrazeneca	No		Male	20	Undergraduate	Year 1	Medicine	No illness	Yes	Moderate. I had to stop my daily activities	Moderate. I had to stop my daily activities	Severe! I had to seek medical attention	Moderate. I had to stop my daily activities	Mild. I was still able to do most daily activities	Severe! I had to seek medical attention	Moderate. I had to stop my daily activities	No	Moderate. I had to stop my daily activities	No	Not sure/	Not sure/	No	No	Moderate. I had to stop my daily activities	No	No	No	1-3 days after	That same day	That same day	1-3 days after	Not Experienced	That same day	That same day	Not Experienced	Not Experienced	Not Experienced	Not Experienced	Not Experienced	Not Experienced		That same day	Not Experienced	Not Experienced	Not Experienced	4-7 days	4-7 days	1-3 days
Yes, only first dose	Covishield/Astrazeneca	No		Male	20	Undergraduate	Year 1	Medicine		No (Please go to Question 17)
Yes, only first dose	Covishield/Astrazeneca	Yes, tested positive (RT-PCR)	Before the 1st dose of vaccination	Female	22	Undergraduate	Year 1	Medicine	No illness	Yes	Mild. I was still able to do most daily activities		Mild. I was still able to do most daily activities	No	No	Mild. I was still able to do most daily activities	Mild. I was still able to do most daily activities					No	No	No	Moderate. I had to stop my daily activities	No	Mild. I was still able to do most daily activities	Not sure/	Not Experienced	That same day	That same day	Not Experienced	Not Experienced	That same day	That same day	Not Experienced	Not Experienced	Not Experienced	Not Experienced	Not Experienced	Not Experienced	Not Experienced	That same day	Not Experienced	Not Experienced	That same day	Not Experienced	1-3 days	1-3 days
Yes, only first dose	Covishield/Astrazeneca	Yes, tested positive (RT-PCR)	Before the 1st dose of vaccination	Female	20	Undergraduate	Year 1	Medicine	No illness	No (Please go to Question 17)
Yes, only first dose	Covishield/Astrazeneca	No		Male	21	Undergraduate	Year 1	Medicine	No illness	Yes	Mild. I was still able to do most daily activities	No	No	Mild. I was still able to do most daily activities	No	Mild. I was still able to do most daily activities	Mild. I was still able to do most daily activities	No	No	No	No	Mild. I was still able to do most daily activities	No	No	No	No	No	No	That same day	Not Experienced	Not Experienced	That same day	Not Experienced	That same day	That same day	Not Experienced	Not Experienced	Not Experienced	Not Experienced	Not Experienced	Not Experienced	Not Experienced	Not Experienced	Not Experienced	Not Experienced	Not Experienced	That same day	Not Experienced	Not Experienced
Yes, only first dose	Covishield/Astrazeneca	No		Male	18	Undergraduate	Year 1	Medicine	No illness	No (Please go to Question 17)
Yes, only first dose	Covishield/Astrazeneca	Yes, never tested (symptomatic)		Female	19	Undergraduate	Year 1	Medicine	No illness	Yes	Moderate. I had to stop my daily activities					Moderate. I had to stop my daily activities	Mild. I was still able to do most daily activities												That same day					That same day	1-3 days after												1-3 days
Yes, only first dose	Covishield/Astrazeneca	Yes, never tested (symptomatic)	Before the 1st dose of vaccination	Female	18	Undergraduate	Year 1	Medicine	No illness	Yes	Mild. I was still able to do most daily activities	Moderate. I had to stop my daily activities	Mild. I was still able to do most daily activities	Mild. I was still able to do most daily activities		Moderate. I had to stop my daily activities	Moderate. I had to stop my daily activities		Mild. I was still able to do most daily activities			Mild. I was still able to do most daily activities							1-3 days after	That same day	1-3 days after	1-3 days after		1-3 days after	1-3 days after					1-3 days after							1-3 days	That same day	1-3 days
Yes, 1st and 2nd doses	Covishield/Astrazeneca	Yes, tested positive (RT-PCR)	After the 2nd dose of vaccination	Male	23	Undergraduate	Tutor	Dentistry	No illness	No (Please go to Question 17)
Yes, 1st and 2nd doses	Covishield/Astrazeneca	No		Female	Twenty one	Undergraduate	Yea 4	Dentistry	No illness	Yes	Severe! I had to seek medical attention	Moderate. I had to stop my daily activities	Moderate. I had to stop my daily activities	Severe! I had to seek medical attention	Mild. I was still able to do most daily activities	Moderate. I had to stop my daily activities	Moderate. I had to stop my daily activities					Severe! I had to seek medical attention	Severe! I had to seek medical attention	Severe! I had to seek medical attention					That same day	That same day	That same day	That same day	That same day	That same day	That same day					That same day	That same day	That same day					1-3 days	1-3 days	1-3 days
Yes, 1st and 2nd doses	Covishield/Astrazeneca	No		Female	24	Undergraduate	CRRI/Intern	Dentistry	No illness	No (Please go to Question 17)
Yes, 1st and 2nd doses	Covishield/Astrazeneca	No		Female	20	Undergraduate	Yea 4		No illness	Yes	Not sure/	Not sure/	Mild. I was still able to do most daily activities	No	No	No	No	No	No		No	No	No	No	No	No	No	No	That same day		That same day	Not Experienced	Not Experienced	Not Experienced	Not Experienced	Not Experienced	Not Experienced		Not Experienced		Not Experienced	Not Experienced	Not Experienced	Not Experienced	Not Experienced	Not Experienced	4-7 days	Not Experienced	That same day
Yes, 1st and 2nd doses	Covishield/Astrazeneca	No		Female	27	Doctor (bds)	Doctor( bds)	Dentistry	Hypothyroidism	No (Please go to Question 17)
Yes, 1st and 2nd doses	Covishield/Astrazeneca	No		Female	22	Undergraduate	CRRI/Intern	Dentistry	No illness	No (Please go to Question 17)
Yes, 1st and 2nd doses	Covishield/Astrazeneca	Yes, tested positive (RT-PCR)	After the 2nd dose of vaccination	Female	21	Undergraduate	Yea 4	Dentistry	No illness	Yes	Moderate. I had to stop my daily activities	Mild. I was still able to do most daily activities	Moderate. I had to stop my daily activities	Not sure/	No	Mild. I was still able to do most daily activities	No	No	No	No	Not sure/	Not sure/	No	No	No	No	No	No	1-3 days after	4-7 days after	1-3 days after	Not Experienced	Not Experienced	Not Experienced	Not Experienced	Not Experienced	Not Experienced	Not Experienced	Not Experienced	1-3 days after	Not Experienced	Not Experienced	Not Experienced	Not Experienced	Not Experienced	Not Experienced	4-7 days	1-3 days	1-3 days
Yes, 1st and 2nd doses	Covishield/Astrazeneca	No		Female	21	Undergraduate		Dentistry	No illness	Yes	Moderate. I had to stop my daily activities	Mild. I was still able to do most daily activities	Moderate. I had to stop my daily activities	Mild. I was still able to do most daily activities	Mild. I was still able to do most daily activities	Moderate. I had to stop my daily activities	Moderate. I had to stop my daily activities	Mild. I was still able to do most daily activities	Moderate. I had to stop my daily activities	Severe! I had to seek medical attention	Mild. I was still able to do most daily activities	Moderate. I had to stop my daily activities	Severe! I had to seek medical attention	Severe! I had to seek medical attention	Mild. I was still able to do most daily activities	Mild. I was still able to do most daily activities	Mild. I was still able to do most daily activities	Mild. I was still able to do most daily activities	That same day	Not Experienced	That same day	That same day	That same day	That same day	That same day	Not Experienced	Not Experienced	Not Experienced	Not Experienced	That same day	That same day	That same day	That same day	Not Experienced	Not Experienced	Not Experienced	4-7 days	Not Experienced	That same day
Yes, 1st and 2nd doses	Covishield/Astrazeneca	Yes, tested positive (RT-PCR)	After the 2nd dose of vaccination	Male	20	Undergraduate		Dentistry	No illness	Yes	Severe! I had to seek medical attention	Severe! I had to seek medical attention	Severe! I had to seek medical attention	Severe! I had to seek medical attention	Not sure/	Severe! I had to seek medical attention	Severe! I had to seek medical attention	Not sure/	Severe! I had to seek medical attention	Not sure/	Not sure/	Severe! I had to seek medical attention			Severe! I had to seek medical attention				That same day	That same day	That same day	That same day	Not Experienced	That same day	That same day	Not Experienced	That same day	Not Experienced	Not Experienced	That same day							That same day	That same day	That same day
Yes, 1st and 2nd doses	Covishield/Astrazeneca	No		Female	18 year	Undergraduate	Year 1		No illness	No (Please go to Question 17)
Not yet (PLEASE DISCONTINUE THE SURVEY)
Yes, 1st and 2nd doses	Covishield/Astrazeneca	No		Female	18	Undergraduate	Year 1	Dentistry	No illness	Yes	Moderate. I had to stop my daily activities	Mild. I was still able to do most daily activities	Not sure/	Mild. I was still able to do most daily activities	No	Mild. I was still able to do most daily activities	Moderate. I had to stop my daily activities	No	No	No	No	Not sure/	No	No	No	No	No	No	That same day	1-3 days after	Not Experienced	That same day	Not Experienced	That same day	That same day	Not Experienced	Not Experienced	Not Experienced	Not Experienced	Not Experienced	Not Experienced	Not Experienced	Not Experienced	Not Experienced	Not Experienced	Not Experienced	4-7 days	4-7 days	That same day
Yes, 1st and 2nd doses	Covishield/Astrazeneca	No		Female	22	Undergraduate	CRRI/Intern	Dentistry	No illness	No (Please go to Question 17)
Yes, 1st and 2nd doses	Covishield/Astrazeneca	No		Female	18	Undergraduate	Year 1	Dentistry	No illness	Yes	Moderate. I had to stop my daily activities	Not sure/	Moderate. I had to stop my daily activities	Moderate. I had to stop my daily activities	No	Moderate. I had to stop my daily activities	Mild. I was still able to do most daily activities	No	No	No	No	Mild. I was still able to do most daily activities	No	No	No	No	No	No	That same day	Not Experienced	That same day	That same day	Not Experienced	That same day	That same day	Not Experienced	Not Experienced	Not Experienced	Not Experienced	That same day	Not Experienced	Not Experienced	Not Experienced	Not Experienced	Not Experienced	Not Experienced	That same day	Not Experienced	That same day
Yes, 1st and 2nd doses	Covishield/Astrazeneca	No		Male	21	Undergraduate		Dentistry	No illness	Yes	Moderate. I had to stop my daily activities	Mild. I was still able to do most daily activities	Moderate. I had to stop my daily activities	No	No	Mild. I was still able to do most daily activities	Mild. I was still able to do most daily activities	No	No	No	Mild. I was still able to do most daily activities	Moderate. I had to stop my daily activities	No	Not sure/	Not sure/	Not sure/	Not sure/	Not sure/	That same day	That same day	That same day	Not Experienced	Not Experienced	Not Experienced	Not Experienced	Not Experienced	Not Experienced	Not Experienced	Not Experienced	That same day	Not Experienced	Not Experienced	Not Experienced	Not Experienced	Not Experienced	Not Experienced	4-7 days	1-3 days	1-3 days
Yes, 1st and 2nd doses	Covishield/Astrazeneca	No		Female	19	Undergraduate	Year 1	Dentistry	No illness	Yes	No	No	Not sure/	Not sure/	No	Not sure/	No	No	No	No	No	No	No	No	No	No	No	No	Not Experienced	Not Experienced	1-3 days after	1-3 days after	Not Experienced	1-3 days after	Not Experienced	Not Experienced	Not Experienced	Not Experienced	Not Experienced	Not Experienced	Not Experienced	Not Experienced	Not Experienced	Not Experienced	Not Experienced	Not Experienced	Not Experienced	Not Experienced	Not Experienced
Yes, 1st and 2nd doses	Covishield/Astrazeneca	No		Female	21	Undergraduate	Yea 4	Dentistry	No illness	Yes	Mild. I was still able to do most daily activities			Moderate. I had to stop my daily activities		Moderate. I had to stop my daily activities						Mild. I was still able to do most daily activities							That same day			That same day		1-3 days after						1-3 days after							4-7 days
Yes, 1st and 2nd doses	Covishield/Astrazeneca	No		Female	21	Undergraduate	Yea 4	Dentistry	No illness	No (Please go to Question 17)
Yes, 1st and 2nd doses	Covishield/Astrazeneca	No		Female	18	Undergraduate	Year 1	Dentistry	No illness	No (Please go to Question 17)
Yes, 1st and 2nd doses	Covishield/Astrazeneca	No		Female	20	Undergraduate	Year 2		Asthma;Mild allergic asthma	No (Please go to Question 17)
Yes, 1st and 2nd doses	Covishield/Astrazeneca	No		Female	19	Undergraduate	Year 2	Dentistry	No illness	No (Please go to Question 17)
Yes, 1st and 2nd doses	Covishield/Astrazeneca	No		Female	19 years	Undergraduate	Year 2	Dentistry	No illness	No (Please go to Question 17)
Yes, 1st and 2nd doses	Covishield/Astrazeneca	No		Female	20	Undergraduate	Year 2	Dentistry	No illness	No (Please go to Question 17)
Yes, 1st and 2nd doses	Covishield/Astrazeneca	Yes, tested positive (RT-PCR)	After the 2nd dose of vaccination	Male	19	Undergraduate	Year 2	Dentistry	No illness	No (Please go to Question 17)
Yes, 1st and 2nd doses	Covishield/Astrazeneca	No		Female	20	Undergraduate	Yea 4	Dentistry	No illness	Yes	Moderate. I had to stop my daily activities	No	Moderate. I had to stop my daily activities	Severe! I had to seek medical attention	No	Mild. I was still able to do most daily activities	No	No	No	Not sure/	Not sure/	Mild. I was still able to do most daily activities	No	No	No	No	No	No	That same day	Not Experienced	That same day	That same day															1-3 days		1-3 days
Yes, 1st and 2nd doses	Covishield/Astrazeneca	No		Female	19	Undergraduate	Year 2	Dentistry	No illness	No (Please go to Question 17)
Yes, only first dose	Covaxin (India)	No		Female	18	Undergraduate	Year 1	Medicine	No illness	No (Please go to Question 17)
Yes, 1st and 2nd doses	Covishield/Astrazeneca	No		Female	22	Undergraduate	CRRI/Intern		No illness	No (Please go to Question 17)
Yes, only first dose	Covishield/Astrazeneca	Yes, tested positive (RT-PCR)		Female	20	Undergraduate	Year 2	Dentistry	No illness	No (Please go to Question 17)
Yes, 1st and 2nd doses	Covishield/Astrazeneca	No		Male	20	Undergraduate	Year 1	Dentistry	No illness	Yes	Mild. I was still able to do most daily activities	No	Moderate. I had to stop my daily activities	Moderate. I had to stop my daily activities	No	Moderate. I had to stop my daily activities	Moderate. I had to stop my daily activities	No		No	No	Moderate. I had to stop my daily activities	No	No	No	No	No	No	That same day	Not Experienced	That same day	That same day		That same day	That same day	Not Experienced	Not Experienced	Not Experienced	4-7 days after	That same day	Not Experienced	Not Experienced	Not Experienced	Not Experienced	Not Experienced	Not Experienced	1-3 days	Not Experienced	1-3 days
Yes, 1st and 2nd doses	Covishield/Astrazeneca	No		Female	20	Undergraduate	Yea 4	Dentistry	No illness	No (Please go to Question 17)
Yes, 1st and 2nd doses	Covishield/Astrazeneca	No		Female	22	Undergraduate	CRRI/Intern	Dentistry	No illness	No (Please go to Question 17)
Not yet (PLEASE DISCONTINUE THE SURVEY)
Yes, 1st and 2nd doses	Covishield/Astrazeneca	Yes, tested positive (RT-PCR)	After the 2nd dose of vaccination	Female	20	Undergraduate	Yea 4	Dentistry	No illness;Obesity	No (Please go to Question 17)
Not yet (PLEASE DISCONTINUE THE SURVEY)
Yes, 1st and 2nd doses	Covishield/Astrazeneca	No		Female	19	Undergraduate	Year 2	Dentistry	No illness	No (Please go to Question 17)
Yes, 1st and 2nd doses	Covishield/Astrazeneca	No		Male	19	Undergraduate	Year 2	Dentistry		No (Please go to Question 17)
Yes, 1st and 2nd doses	Covishield/Astrazeneca	No		Female	20	Undergraduate	Year 2	Dentistry	No illness	No (Please go to Question 17)
Yes, 1st and 2nd doses	Covishield/Astrazeneca	No		Female	21	Undergraduate	CRRI/Intern		PCOD	No (Please go to Question 17)
Yes, 1st and 2nd doses	Covishield/Astrazeneca	Yes, tested positive (RT-PCR)	After the 2nd dose of vaccination	Female	20	Undergraduate	Yea 4	Dentistry	No illness;Obesity	No (Please go to Question 17)
Yes, 1st and 2nd doses	Covishield/Astrazeneca	No		Female	21	Undergraduate	CRRI/Intern	Dentistry	No illness	No (Please go to Question 17)
Not yet (PLEASE DISCONTINUE THE SURVEY)
Not yet (PLEASE DISCONTINUE THE SURVEY)
Yes, 1st and 2nd doses	Covishield/Astrazeneca	No		Female	23	Undergraduate	Year 1	Medicine	No illness	No (Please go to Question 17)
Yes, 1st and 2nd doses	Covishield/Astrazeneca	No		Male	19	Undergraduate	Year 1	Medicine	No illness	No (Please go to Question 17)
Not yet (PLEASE DISCONTINUE THE SURVEY)
Yes, 1st and 2nd doses	Covishield/Astrazeneca	No		Female	20	Undergraduate	Year 1	Medicine		No (Please go to Question 17)
Yes, 1st and 2nd doses	Covishield/Astrazeneca	No		Male	19	Undergraduate	Year 1	Medicine	No illness	No (Please go to Question 17)
Yes, 1st and 2nd doses	Covishield/Astrazeneca	No		Male	22	Undergraduate	Year 2	Medicine	No illness	No (Please go to Question 17)
Yes, 1st and 2nd doses	Covishield/Astrazeneca	No		Female	21	Undergraduate	Year 2	Medicine	No illness	No (Please go to Question 17)
Yes, 1st and 2nd doses	Covishield/Astrazeneca	Yes, tested positive (RT-PCR)	Between 1st dose and 2nd dose of vaccination	Male	21	Undergraduate	Year 2	Medicine	No illness	No (Please go to Question 17)
Yes, only first dose	Covishield/Astrazeneca	No		Male	20	Undergraduate	Year 1	Medicine	No illness	No (Please go to Question 17)
Yes, 1st and 2nd doses	Covishield/Astrazeneca	No		Female	20	Undergraduate	Year 1	Medicine	No illness	No (Please go to Question 17)
Yes, only first dose	Covishield/Astrazeneca	No		Male	20	Undergraduate	Year 2	Medicine	No illness	No (Please go to Question 17)
Yes, 1st and 2nd doses	Covishield/Astrazeneca	No		Male	20	Undergraduate	Year 1	Medicine	No illness	No (Please go to Question 17)
Yes, only first dose	Covishield/Astrazeneca	No		Female	21	Undergraduate	Year 2	Medicine	No illness	No (Please go to Question 17)
Yes, 1st and 2nd doses	Covishield/Astrazeneca	No		Female	20	Undergraduate	Year 1	Medicine	No illness	Yes	Moderate. I had to stop my daily activities	Moderate. I had to stop my daily activities	No	Moderate. I had to stop my daily activities	No	Moderate. I had to stop my daily activities	Moderate. I had to stop my daily activities	No	No	No	No	No	No	No	No	No	Moderate. I had to stop my daily activities	No	That same day	That same day	Not Experienced	1-3 days after	Not Experienced	1-3 days after	1-3 days after	Not Experienced	Not Experienced	Not Experienced	Not Experienced	Not Experienced	Not Experienced	Not Experienced	Not Experienced		1-3 days after	1-3 days after	1-3 days	1-3 days	Not Experienced
Yes, 1st and 2nd doses	Covishield/Astrazeneca	No		Female	18	Undergraduate	Year 1	Medicine	No illness	Yes	Moderate. I had to stop my daily activities		Moderate. I had to stop my daily activities			Moderate. I had to stop my daily activities	Moderate. I had to stop my daily activities					Moderate. I had to stop my daily activities							That same day		That same day			That same day	That same day												1-3 days		1-3 days
Yes, only first dose	Covishield/Astrazeneca	Yes, tested positive (RT-PCR)	Before the 1st dose of vaccination	Female	19	Undergraduate	Year 1	Medicine	No illness	Yes	Moderate. I had to stop my daily activities	Moderate. I had to stop my daily activities	Severe! I had to seek medical attention	Severe! I had to seek medical attention		Severe! I had to seek medical attention	Severe! I had to seek medical attention					Moderate. I had to stop my daily activities	Mild. I was still able to do most daily activities	Mild. I was still able to do most daily activities			Mild. I was still able to do most daily activities		That same day	That same day	1-3 days after	That same day		That same day	That same day							1-3 days after					4-7 days	4-7 days	4-7 days
Yes, 1st and 2nd doses	Covishield/Astrazeneca	No		Male	21	Undergraduate	Year 1	Medicine	No illness	No (Please go to Question 17)
Yes, 1st and 2nd doses	Covishield/Astrazeneca	No		Male	21	Undergraduate	Year 2	Medicine	Hypertension	No (Please go to Question 17)
Yes, 1st and 2nd doses	Covishield/Astrazeneca	No		Male	20	Undergraduate	Year 2	Medicine	No illness	Yes	Moderate. I had to stop my daily activities	Moderate. I had to stop my daily activities	Moderate. I had to stop my daily activities	Moderate. I had to stop my daily activities	Mild. I was still able to do most daily activities	Moderate. I had to stop my daily activities	Moderate. I had to stop my daily activities					Severe! I had to seek medical attention		Severe! I had to seek medical attention					1-3 days after	1-3 days after	1-3 days after	1-3 days after	1-3 days after	1-3 days after	1-3 days after	1-3 days after	1-3 days after	1-3 days after	1-3 days after	1-3 days after	1-3 days after	1-3 days after	1-3 days after	1-3 days after	1-3 days after	1-3 days after
Yes, 1st and 2nd doses	Covishield/Astrazeneca	No		Male	19	Undergraduate	Year 1	Medicine	No illness	Yes	Mild. I was still able to do most daily activities	Not sure/	Not sure/	Mild. I was still able to do most daily activities	Not sure/	Mild. I was still able to do most daily activities	Mild. I was still able to do most daily activities	Not sure/	Not sure/	Not sure/	Not sure/	Not sure/	Not sure/	Not sure/	Not sure/	Not sure/	Not sure/	Not sure/	That same day	Not Experienced	Not Experienced	That same day	Not Experienced	1-3 days after	That same day	Not Experienced	Not Experienced	Not Experienced	Not Experienced	Not Experienced	Not Experienced	Not Experienced	Not Experienced	Not Experienced	Not Experienced	Not Experienced	1-3 days	Still present	Still present
Yes, 1st and 2nd doses	Covishield/Astrazeneca	No		Female	20	Undergraduate	Year 2	Medicine	No illness	Yes	Mild. I was still able to do most daily activities	Moderate. I had to stop my daily activities	Moderate. I had to stop my daily activities	Mild. I was still able to do most daily activities	No	Moderate. I had to stop my daily activities	Moderate. I had to stop my daily activities	No	Not sure/	No	Not sure/	No	No	No	No	No	No	No	That same day	That same day	1-3 days after	1-3 days after	Not Experienced	That same day	1-3 days after	Not Experienced	Not Experienced	Not Experienced	Not Experienced	Not Experienced	Not Experienced	Not Experienced	Not Experienced	Not Experienced	Not Experienced	Not Experienced	4-7 days	1-3 days	1-3 days
Yes, only first dose	Covishield/Astrazeneca	Yes, tested positive (RT-PCR)	Between 1st dose and 2nd dose of vaccination	Male	20	Undergraduate	Year 3	Medicine	No illness	Yes	Mild. I was still able to do most daily activities	No	Moderate. I had to stop my daily activities	Not sure/	Mild. I was still able to do most daily activities	Mild. I was still able to do most daily activities	No	No	Mild. I was still able to do most daily activities	No	No	No	No	No	No	No	No	No	That same day	Not Experienced	1-3 days after	1-3 days after	1-3 days after	1-3 days after	Not Experienced	Not Experienced	Not Experienced	Not Experienced	Not Experienced	Not Experienced	Not Experienced	Not Experienced	Not Experienced	Not Experienced	Not Experienced	Not Experienced	That same day	Not Experienced	That same day
Yes, only first dose	Covishield/Astrazeneca	No		Female	20	Undergraduate	Year 1	Medicine	No illness	Yes		Mild. I was still able to do most daily activities																		That same day																	1-3 days
Not yet (PLEASE DISCONTINUE THE SURVEY)
Not yet (PLEASE DISCONTINUE THE SURVEY)
Not yet (PLEASE DISCONTINUE THE SURVEY)
Not yet (PLEASE DISCONTINUE THE SURVEY)
Yes, 1st and 2nd doses	Covishield/Astrazeneca	Yes, tested positive (RT-PCR)	Between 1st dose and 2nd dose of vaccination	Female	21	Undergraduate	Year 1	Medicine	No illness	Yes	Moderate. I had to stop my daily activities	No	Mild. I was still able to do most daily activities	Severe! I had to seek medical attention	No	Severe! I had to seek medical attention	Moderate. I had to stop my daily activities	No	No	No	No	Severe! I had to seek medical attention	No	No	Mild. I was still able to do most daily activities	Not sure/	Moderate. I had to stop my daily activities	Severe! I had to seek medical attention	1-3 days after	1-3 days after	1-3 days after	1-3 days after	1-3 days after	1-3 days after	1-3 days after	1-3 days after	1-3 days after	1-3 days after	1-3 days after	1-3 days after	1-3 days after	1-3 days after	1-3 days after	1-3 days after	1-3 days after	1-3 days after	1-3 days	1-3 days	1-3 days
Yes, 1st and 2nd doses	Covishield/Astrazeneca	No		Female	22	Undergraduate	Year 2	Medicine	No illness	Yes			Mild. I was still able to do most daily activities	Mild. I was still able to do most daily activities																	That same day	That same day																	1-3 days
Yes, 1st and 2nd doses	Covishield/Astrazeneca	No		Male	21	Undergraduate	Year 1	Medicine	No illness	No (Please go to Question 17)
Not yet (PLEASE DISCONTINUE THE SURVEY)
Not yet (PLEASE DISCONTINUE THE SURVEY)
Yes, 1st and 2nd doses	Covishield/Astrazeneca	No		Female	21	Undergraduate	Year 2	Medicine	No illness	Yes	Mild. I was still able to do most daily activities	Not sure/	Not sure/	Not sure/	Not sure/	Mild. I was still able to do most daily activities	Mild. I was still able to do most daily activities	Not sure/	Not sure/	Not sure/	Not sure/	Not sure/	Severe! I had to seek medical attention	Severe! I had to seek medical attention	Not sure/	Not sure/	Not sure/	Not sure/	Not Experienced	Not Experienced	Not Experienced	Not Experienced	Not Experienced	That same day	That same day	Not Experienced	Not Experienced	Not Experienced	Not Experienced	Not Experienced	1-3 days after	1-3 days after	Not Experienced	Not Experienced	Not Experienced	Not Experienced	Not Experienced	Not Experienced	Not Experienced
Yes, 1st and 2nd doses	Covishield/Astrazeneca	No		Female	21	Undergraduate	Year 2	Medicine	Pcos	Yes	Mild. I was still able to do most daily activities	Mild. I was still able to do most daily activities	No	No	No	No	No	No	No	No	No	No	No	No	No	No	Moderate. I had to stop my daily activities	Moderate. I had to stop my daily activities																	That same day	That same day
Yes, only first dose	Covishield/Astrazeneca	Yes, never tested (symptomatic)	Between 1st dose and 2nd dose of vaccination	Female	19	Undergraduate	Year 1	Medicine	No illness;Asthma	Yes	Moderate. I had to stop my daily activities	Moderate. I had to stop my daily activities	Mild. I was still able to do most daily activities	Moderate. I had to stop my daily activities	Not sure/	Moderate. I had to stop my daily activities	Moderate. I had to stop my daily activities	No	No	No	No	Moderate. I had to stop my daily activities	No	No	No	No	No	No	That same day	That same day	Not Experienced	That same day	Not Experienced	That same day	That same day	Not Experienced	Not Experienced	Not Experienced	Not Experienced	That same day	Not Experienced	Not Experienced	Not Experienced	Not Experienced	Not Experienced	Not Experienced	1-3 days	1-3 days	1-3 days
Yes, only first dose	Covishield/Astrazeneca	Yes, tested positive (RT-PCR)	Between 1st dose and 2nd dose of vaccination	Male	22	Undergraduate	Year 2	Medicine	No illness	No (Please go to Question 17)
Yes, only first dose	Covishield/Astrazeneca	Yes, tested positive (RT-PCR)	Between 1st dose and 2nd dose of vaccination	Male	20	Undergraduate	Year 2	Medicine	No illness	No (Please go to Question 17)
Yes, only first dose	Covishield/Astrazeneca	No		Female	19 years	Undergraduate	Year 1	Medicine	No illness	No (Please go to Question 17)
Yes, 1st and 2nd doses	Covishield/Astrazeneca	No		Male	18	Undergraduate	Year 1	Medicine	No illness	No (Please go to Question 17)
Yes, only first dose	Covishield/Astrazeneca	No		Female	21	Undergraduate	Year 2	Medicine	Obesity	Yes	Mild. I was still able to do most daily activities	No	Mild. I was still able to do most daily activities	No	No	Not sure/	No	No	No	No	No	Mild. I was still able to do most daily activities	No	Mild. I was still able to do most daily activities	No	No	No	No	1-3 days after	Not Experienced	1-3 days after	Not Experienced	Not Experienced	Not Experienced	Not Experienced	Not Experienced	Not Experienced	Not Experienced	Not Experienced	1-3 days after	Not Experienced	1-3 days after	Not Experienced	Not Experienced	Not Experienced	Not Experienced	1-3 days	Not Experienced	1-3 days
Yes, 1st and 2nd doses	Covishield/Astrazeneca	No		Female	18 year	Undergraduate	Year 1	Medicine	No illness	No (Please go to Question 17)
Yes, 1st and 2nd doses	Covishield/Astrazeneca	No		Female	20	Undergraduate	Year 2	Medicine	No illness	No (Please go to Question 17)
Yes, only first dose	Covishield/Astrazeneca	Yes, tested positive (RT-PCR)	Before the 1st dose of vaccination	Female	19	Undergraduate	Year 1	Medicine	No illness	Yes	Mild. I was still able to do most daily activities	No	Mild. I was still able to do most daily activities	Not sure/	Mild. I was still able to do most daily activities	Mild. I was still able to do most daily activities	Mild. I was still able to do most daily activities	Not sure/	Not sure/	Not sure/	Not sure/	Moderate. I had to stop my daily activities	Not sure/	Not sure/	Mild. I was still able to do most daily activities	Mild. I was still able to do most daily activities	Mild. I was still able to do most daily activities	Mild. I was still able to do most daily activities	That same day	Not Experienced	That same day	Not Experienced	That same day	That same day	That same day	Not Experienced	Not Experienced	Not Experienced	Not Experienced	That same day	Not Experienced	Not Experienced	Not Experienced	Not Experienced	Not Experienced	Not Experienced	1-3 days	Not Experienced	1-3 days
Yes, 1st and 2nd doses	Covishield/Astrazeneca	No		Male	20	Undergraduate	Year 1	Medicine	No illness	No (Please go to Question 17)
Yes, 1st and 2nd doses	Covishield/Astrazeneca	No		Female	20	Undergraduate	Year 1	Medicine	No illness	Yes	Mild. I was still able to do most daily activities	Mild. I was still able to do most daily activities	Not sure/	No	No	Not sure/	Not sure/	No	No			Not sure/	No	No	No	No	No	No	That same day	That same day	Not Experienced	Not Experienced	Not Experienced	That same day	That same day	Not Experienced	Not Experienced	Not Experienced	Not Experienced	That same day	Not Experienced	Not Experienced	Not Experienced	Not Experienced	Not Experienced	Not Experienced	1-3 days	That same day	Not Experienced
Yes, 1st and 2nd doses	Covishield/Astrazeneca	No		Male	21	Undergraduate	Year 2	Medicine	No illness	Yes	Moderate. I had to stop my daily activities	Mild. I was still able to do most daily activities				Mild. I was still able to do most daily activities	Mild. I was still able to do most daily activities												That same day	That same day	Not Experienced	Not Experienced	Not Experienced	Not Experienced	Not Experienced	Not Experienced	Not Experienced	Not Experienced	Not Experienced	Not Experienced	Not Experienced	Not Experienced	Not Experienced	Not Experienced	Not Experienced	Not Experienced	4-7 days	1-3 days	Not Experienced
Yes, 1st and 2nd doses	Covishield/Astrazeneca	No		Female	20	Undergraduate	Year 1	Medicine	No illness	No (Please go to Question 17)
Yes, 1st and 2nd doses	Covishield/Astrazeneca	Yes, tested positive (RT-PCR)	Between 1st dose and 2nd dose of vaccination	Female	20 year	Undergraduate	Year 1	Medicine		Yes	Mild. I was still able to do most daily activities		Mild. I was still able to do most daily activities			Mild. I was still able to do most daily activities	Mild. I was still able to do most daily activities												That same day		That same day				That same day				That same day								1-3 days	1-3 days	1-3 days
Yes, 1st and 2nd doses	Covishield/Astrazeneca	No		Female	19	Undergraduate	Year 1	Medicine	No illness	Yes	Moderate. I had to stop my daily activities	Mild. I was still able to do most daily activities	Moderate. I had to stop my daily activities	Moderate. I had to stop my daily activities	No	Mild. I was still able to do most daily activities	Not sure/	Mild. I was still able to do most daily activities	No	No	No	No	No	No	No	No	Not sure/	Not sure/	That same day	That same day	That same day	That same day	Not Experienced	That same day	Not Experienced	That same day	Not Experienced	Not Experienced	Not Experienced	Not Experienced	Not Experienced	Not Experienced	Not Experienced	Not Experienced	That same day	That same day	1-3 days	1-3 days	1-3 days
Yes, only first dose	Covishield/Astrazeneca	No		Male	23 years	Undergraduate	Year 1	Medicine	No illness	No (Please go to Question 17)
Yes, 1st and 2nd doses	Covishield/Astrazeneca	No		Female	20	Undergraduate	Year 1	Medicine	No illness	No (Please go to Question 17)
Yes, 1st and 2nd doses	Covishield/Astrazeneca	Yes, tested positive (RT-PCR)	Before the 1st dose of vaccination	Female	19	Undergraduate	Year 1	Medicine	No illness	No (Please go to Question 17)
Yes, 1st and 2nd doses	Covishield/Astrazeneca	No		Female	19	Postgraduate	Year 2	Medicine	No illness	Yes	Moderate. I had to stop my daily activities	Moderate. I had to stop my daily activities	Moderate. I had to stop my daily activities	Moderate. I had to stop my daily activities	No	Moderate. I had to stop my daily activities	Moderate. I had to stop my daily activities	No	No	No	No	No	No	No	No	Moderate. I had to stop my daily activities	No	No	That same day	That same day	That same day	That same day	Not Experienced	That same day	That same day	Not Experienced	Not Experienced	Not Experienced	Not Experienced	Not Experienced	Not Experienced	Not Experienced	Not Experienced	1-3 days after	Not Experienced	Not Experienced	4-7 days	4-7 days	1-3 days
Yes, 1st and 2nd doses	Covishield/Astrazeneca	No		Male	21 years	Undergraduate	Year 2	Medicine	No illness	No (Please go to Question 17)
Yes, only first dose	Covishield/Astrazeneca	No		Male	23	Undergraduate	Year 3	Medicine	No illness	No (Please go to Question 17)
Yes, 1st and 2nd doses	Covishield/Astrazeneca	No		Female	21	Undergraduate	Year 2	Medicine	Liver disease	No (Please go to Question 17)
Yes, 1st and 2nd doses	Covishield/Astrazeneca	No		Female	23	Undergraduate	Year 2	Medicine	No illness	Yes	Mild. I was still able to do most daily activities	Not sure/	Moderate. I had to stop my daily activities	No	No	Moderate. I had to stop my daily activities	Mild. I was still able to do most daily activities	No	No	No	No	Mild. I was still able to do most daily activities	No	No	No	No	No	No	That same day	Not Experienced	That same day	Not Experienced	Not Experienced	1-3 days after	1-3 days after	Not Experienced	Not Experienced	Not Experienced	Not Experienced	Not Experienced	Not Experienced	Not Experienced	Not Experienced	Not Experienced	Not Experienced	Not Experienced	1-3 days	Still present	1-3 days
Not yet (PLEASE DISCONTINUE THE SURVEY)
Not yet (PLEASE DISCONTINUE THE SURVEY)
Yes, 1st and 2nd doses	Covishield/Astrazeneca	Yes, tested positive (RT-PCR)	Before the 1st dose of vaccination	Male	19	Undergraduate	Year 1	Medicine	No illness	Yes	No	No	Mild. I was still able to do most daily activities	Severe! I had to seek medical attention	No	Moderate. I had to stop my daily activities	No	No		No	No	No	No	No	No	No	No	No	Not Experienced	Not Experienced	Not Experienced	That same day	Not Experienced	That same day	Not Experienced	Not Experienced	Not Experienced	Not Experienced	Not Experienced	Not Experienced	Not Experienced	Not Experienced	Not Experienced	Not Experienced	Not Experienced	Not Experienced	Not Experienced	Not Experienced	That same day
Yes, 1st and 2nd doses	Covishield/Astrazeneca	No		Female	19	Undergraduate	Year 1	Dentistry	No illness	No (Please go to Question 17)
Yes, 1st and 2nd doses	Covishield/Astrazeneca	No		Female	20	Undergraduate	Year 1	Medicine	No illness	No (Please go to Question 17)
Yes, 1st and 2nd doses	Covishield/Astrazeneca	No		Male	21	Undergraduate	Year 1	Medicine	Asthma	Yes	Moderate. I had to stop my daily activities	Mild. I was still able to do most daily activities	No	Not sure/	No	Not sure/	Not sure/	Not sure/	Not sure/	No	No	Not sure/	No	No	Mild. I was still able to do most daily activities	No	Mild. I was still able to do most daily activities	No	1-3 days after	1-3 days after	Not Experienced	Not Experienced	Not Experienced	Not Experienced	Not Experienced	Not Experienced	Not Experienced	Not Experienced	Not Experienced	1-3 days after	Not Experienced	Not Experienced	1-3 days after	Not Experienced	1-3 days after	Not Experienced
Not yet (PLEASE DISCONTINUE THE SURVEY)
Yes, 1st and 2nd doses	Covishield/Astrazeneca	No		Male	22	Undergraduate	Year 2	Medicine	No illness	Yes	No	No		Mild. I was still able to do most daily activities	No	Mild. I was still able to do most daily activities	No	No	No	No	No	No	No	No	No	No	No	No	Not Experienced	Not Experienced	1-3 days after	1-3 days after	Not Experienced	1-3 days after	Not Experienced	Not Experienced	Not Experienced	Not Experienced	Not Experienced	Not Experienced	Not Experienced	Not Experienced	Not Experienced	Not Experienced	Not Experienced	Not Experienced	Not Experienced	Not Experienced	1-3 days
Yes, 1st and 2nd doses	Covishield/Astrazeneca	No		Female	21	Undergraduate	Year 2	Dentistry	Obesity	Yes	Moderate. I had to stop my daily activities	Not sure/	Mild. I was still able to do most daily activities	Moderate. I had to stop my daily activities	No	Moderate. I had to stop my daily activities	Moderate. I had to stop my daily activities	No	Mild. I was still able to do most daily activities	No	No	Mild. I was still able to do most daily activities	No	Not sure/	No	No	No	No	That same day	1-3 days after	That same day	That same day	Not Experienced	1-3 days after	1-3 days after	Not Experienced	Not Experienced	Not Experienced	Not Experienced	Not Experienced	Not Experienced	Not Experienced	Not Experienced	Not Experienced	Not Experienced	Not Experienced	4-7 days	4-7 days	1-3 days
Yes, only first dose	Covishield/Astrazeneca	No		Female	21	Undergraduate	Year 2	Medicine	No illness	Yes	Moderate. I had to stop my daily activities		Severe! I had to seek medical attention	Severe! I had to seek medical attention	No	Mild. I was still able to do most daily activities	Mild. I was still able to do most daily activities		No	No	No	Mild. I was still able to do most daily activities	No	No	No	No	No	No	That same day		That same day	That same day		That same day													4-7 days		1-3 days
Yes, 1st and 2nd doses	Covishield/Astrazeneca	No		Female	18 years	Undergraduate	Year 1	Medicine	No illness	Yes	Mild. I was still able to do most daily activities	No	Mild. I was still able to do most daily activities	Mild. I was still able to do most daily activities	No	Mild. I was still able to do most daily activities	No	Mild. I was still able to do most daily activities	No	No	No	No	No	No	No	No	No	No	That same day	Not Experienced	That same day	That same day	Not Experienced	That same day	Not Experienced	That same day	Not Experienced	Not Experienced	Not Experienced	Not Experienced	Not Experienced	Not Experienced	Not Experienced	Not Experienced	Not Experienced	Not Experienced	1-3 days	Not Experienced	1-3 days
Yes, 1st and 2nd doses	Covishield/Astrazeneca	No		Male	21	Undergraduate	Year 1	Medicine	No illness	Yes	Mild. I was still able to do most daily activities	Not sure/	Mild. I was still able to do most daily activities	Mild. I was still able to do most daily activities	Not sure/	Mild. I was still able to do most daily activities	Moderate. I had to stop my daily activities	Not sure/	Not sure/	Mild. I was still able to do most daily activities	Not sure/	Mild. I was still able to do most daily activities	Not sure/	Not sure/	Not sure/	Not sure/	Not sure/	Not sure/	1-3 days after	Not Experienced	1-3 days after	1-3 days after	Not Experienced	1-3 days after	1-3 days after	Not Experienced	Not Experienced	Not Experienced	Not Experienced	1-3 days after	Not Experienced	Not Experienced	Not Experienced	Not Experienced	Not Experienced	Not Experienced	1-3 days	1-3 days	1-3 days
Yes, only first dose	Covishield/Astrazeneca	No		Male	20	Undergraduate	Year 1	Medicine	No illness	Yes	Mild. I was still able to do most daily activities	No	No	No	No	Mild. I was still able to do most daily activities	Mild. I was still able to do most daily activities	No	No	No	No	No	No	No	No	No	No	No	Not Experienced	Not Experienced	Not Experienced	Not Experienced	Not Experienced	1-3 days after	1-3 days after	Not Experienced	Not Experienced	Not Experienced	Not Experienced	1-3 days after	Not Experienced	Not Experienced	Not Experienced	Not Experienced	Not Experienced	Not Experienced	1-3 days	Not Experienced	Not Experienced
Yes, 1st and 2nd doses	Covishield/Astrazeneca	Yes, tested positive (RT-PCR)	Before the 1st dose of vaccination	Male	19	Undergraduate	Year 1	Medicine	No illness	Yes	No	No	Mild. I was still able to do most daily activities	Severe! I had to seek medical attention	No	Moderate. I had to stop my daily activities	No	No		No	No	No	No	No	No	No	No	No	Not Experienced	Not Experienced	Not Experienced	That same day	Not Experienced	That same day	Not Experienced	Not Experienced	Not Experienced	Not Experienced	Not Experienced	Not Experienced	Not Experienced	Not Experienced	Not Experienced	Not Experienced	Not Experienced	Not Experienced	Not Experienced	Not Experienced	That same day
Yes, only first dose	Covishield/Astrazeneca	No		Male	20	Undergraduate	Year 1	Medicine	No illness	Yes	Mild. I was still able to do most daily activities	No	Mild. I was still able to do most daily activities	Mild. I was still able to do most daily activities	No	Mild. I was still able to do most daily activities	Mild. I was still able to do most daily activities	No	No	No	No	No	No	No	No	Mild. I was still able to do most daily activities	No	No	That same day	Not Experienced	1-3 days after	1-3 days after	Not Experienced	1-3 days after	1-3 days after	Not Experienced	Not Experienced	Not Experienced	Not Experienced	Not Experienced	Not Experienced	Not Experienced		1-3 days after	Not Experienced	Not Experienced	4-7 days	Not Experienced	1-3 days
Not yet (PLEASE DISCONTINUE THE SURVEY)
Yes, 1st and 2nd doses	Covishield/Astrazeneca	No		Female	20	Undergraduate	Year 2	Medicine	No illness	Yes	Severe! I had to seek medical attention	Mild. I was still able to do most daily activities	Severe! I had to seek medical attention	Severe! I had to seek medical attention	No	Moderate. I had to stop my daily activities	Moderate. I had to stop my daily activities	No	No	No	No	No	No	No	No	No	Mild. I was still able to do most daily activities	No	That same day		1-3 days after	That same day		1-3 days after	1-3 days after												4-7 days	1-3 days	1-3 days
Yes, 1st and 2nd doses	Covishield/Astrazeneca	No		Female	22	Undergraduate	CRRI/Intern	Dentistry	No illness	No (Please go to Question 17)
Yes, 1st and 2nd doses	Covishield/Astrazeneca	No		Female	22	Undergraduate		Dentistry	No illness	No (Please go to Question 17)
Yes, 1st and 2nd doses	Covishield/Astrazeneca	No		Female	21	Undergraduate		Dentistry	No illness	Yes	Mild. I was still able to do most daily activities	Mild. I was still able to do most daily activities	Mild. I was still able to do most daily activities	Moderate. I had to stop my daily activities	No	No	Mild. I was still able to do most daily activities	No	No	No	No	Mild. I was still able to do most daily activities	No	No	No	No	No	No	That same day	That same day	That same day	That same day	Not Experienced	Not Experienced	Not Experienced	Not Experienced	Not Experienced	Not Experienced	Not Experienced	Not Experienced	Not Experienced	Not Experienced	Not Experienced	Not Experienced	Not Experienced	Not Experienced	1-3 days	1-3 days	1-3 days
Yes, only first dose	Covishield/Astrazeneca	Yes, tested positive (RT-PCR)	Between 1st dose and 2nd dose of vaccination	Female	22	Undergraduate	CRRI/Intern	Dentistry	No illness	No (Please go to Question 17)
Yes, 1st and 2nd doses	Covishield/Astrazeneca	No		Female	23	Undergraduate	CRRI/Intern	Dentistry	No illness	No (Please go to Question 17)
Yes, 1st and 2nd doses	Covishield/Astrazeneca	No		Female	20	Undergraduate		Dentistry	No illness	No (Please go to Question 17)
Yes, only first dose	Covishield/Astrazeneca	Yes, tested positive (RT-PCR)	Between 1st dose and 2nd dose of vaccination	Female	21	Undergraduate	Yea 4	Dentistry	No illness	No (Please go to Question 17)
Yes, 1st and 2nd doses	Covishield/Astrazeneca	No		Female	22	Undergraduate	Year 3	Dentistry	No illness	Yes	Mild. I was still able to do most daily activities	No	Moderate. I had to stop my daily activities	No	No	Mild. I was still able to do most daily activities	Moderate. I had to stop my daily activities	No	No	No	No	No	No	No	No	No	No	No	That same day	Not Experienced	That same day	Not Experienced	Not Experienced	That same day	That same day	Not Experienced	Not Experienced	Not Experienced	Not Experienced	Not Experienced	Not Experienced	Not Experienced	Not Experienced	Not Experienced	Not Experienced	Not Experienced	1-3 days	Not Experienced	1-3 days
Yes, only first dose	Covishield/Astrazeneca	No		Female	22 yr	Undergraduate	CRRI/Intern	Dentistry	No illness	No (Please go to Question 17)
Yes, 1st and 2nd doses	Covishield/Astrazeneca	No		Female	20	Undergraduate		Dentistry	No illness	No (Please go to Question 17)
Yes, 1st and 2nd doses	Covishield/Astrazeneca	No		Female	19	Undergraduate	Year 2	Dentistry	No illness	No (Please go to Question 17)
Yes, 1st and 2nd doses	Covishield/Astrazeneca	No		Female	22	Undergraduate	CRRI/Intern	Dentistry	No illness	Yes	Mild. I was still able to do most daily activities			Moderate. I had to stop my daily activities		Moderate. I had to stop my daily activities	Moderate. I had to stop my daily activities					Moderate. I had to stop my daily activities							That same day			That same day		That same day	That same day												1-3 days
Yes, 1st and 2nd doses	Covishield/Astrazeneca	Yes, tested positive (RT-PCR)	Between 1st dose and 2nd dose of vaccination	Female	21	Undergraduate	Yea 4	Dentistry	No illness	No (Please go to Question 17)
Yes, 1st and 2nd doses	Covishield/Astrazeneca	Yes, never tested (symptomatic)		Male	22	Undergraduate	Yea 4	Dentistry	No illness	No (Please go to Question 17)
Yes, 1st and 2nd doses	Covaxin (India)	Yes, tested positive (RT-PCR)	Before the 1st dose of vaccination	Female	20	Undergraduate	Yea 4	Dentistry	No illness	No (Please go to Question 17)
Yes, 1st and 2nd doses	Covishield/Astrazeneca	No		Female	19	Undergraduate	Year 2	Dentistry	No illness	No (Please go to Question 17)
Yes, 1st and 2nd doses	Covishield/Astrazeneca	No		Female	20	Undergraduate	Year 3	Dentistry	No illness	Yes	Mild. I was still able to do most daily activities	No	Moderate. I had to stop my daily activities	Moderate. I had to stop my daily activities	No	Mild. I was still able to do most daily activities	Moderate. I had to stop my daily activities	No	Not sure/	Not sure/	Not sure/	Mild. I was still able to do most daily activities	No	No	No	No	Severe! I had to seek medical attention	Severe! I had to seek medical attention	That same day	Not Experienced	That same day	That same day	Not Experienced	Not Experienced	That same day	Not Experienced	Not Experienced	Not Experienced	Not Experienced	Not Experienced	Not Experienced	Not Experienced	Not Experienced	Not Experienced	That same day	That same day	1-3 days	Not Experienced	That same day
Yes, 1st and 2nd doses	Covishield/Astrazeneca	No		Female	19	Undergraduate	Year 2	Dentistry	No illness	Yes	Mild. I was still able to do most daily activities	Mild. I was still able to do most daily activities	Moderate. I had to stop my daily activities	Mild. I was still able to do most daily activities	Mild. I was still able to do most daily activities	Mild. I was still able to do most daily activities	Mild. I was still able to do most daily activities																														1-3 days
Yes, 1st and 2nd doses	Covishield/Astrazeneca	No		Female	20 years	Undergraduate		Dentistry	No illness	No (Please go to Question 17)
Yes, 1st and 2nd doses	Covishield/Astrazeneca	No		Female	20	Undergraduate	Year 2	Dentistry	No illness	Yes	Moderate. I had to stop my daily activities	Moderate. I had to stop my daily activities	Severe! I had to seek medical attention	Moderate. I had to stop my daily activities	No	Moderate. I had to stop my daily activities	Mild. I was still able to do most daily activities	No	No	No	No	Severe! I had to seek medical attention	Not sure/	Not sure/	Mild. I was still able to do most daily activities	Mild. I was still able to do most daily activities	Moderate. I had to stop my daily activities	Moderate. I had to stop my daily activities	1-3 days after	1-3 days after	1-3 days after	1-3 days after	Not Experienced	That same day	That same day	Not Experienced	Not Experienced	Not Experienced	Not Experienced	1-3 days after	1-3 days after	1-3 days after	1-3 days after	1-3 days after	1-3 days after	1-3 days after	4-7 days	4-7 days	4-7 days
Yes, 1st and 2nd doses	Covishield/Astrazeneca	No		Female	21	Undergraduate	Yea 4	Dentistry	No illness	No (Please go to Question 17)
Yes, 1st and 2nd doses	Covishield/Astrazeneca	No		Male	21	Undergraduate	Year 3	Dentistry	No illness	Yes			Moderate. I had to stop my daily activities																		That same day																		That same day
Yes, 1st and 2nd doses	Covishield/Astrazeneca	No		Female	19	Undergraduate	Year 2	Dentistry	No illness	Yes	Moderate. I had to stop my daily activities		Moderate. I had to stop my daily activities			Moderate. I had to stop my daily activities	Moderate. I had to stop my daily activities					Moderate. I had to stop my daily activities							1-3 days after		That same day			1-3 days after	That same day					1-3 days after							1-3 days
Yes, 1st and 2nd doses	Covishield/Astrazeneca	No		Female	19	Undergraduate	Year 2	Dentistry	No illness	Yes	Moderate. I had to stop my daily activities	Severe! I had to seek medical attention	Mild. I was still able to do most daily activities	Severe! I had to seek medical attention	Moderate. I had to stop my daily activities	Moderate. I had to stop my daily activities	Severe! I had to seek medical attention	No	Not sure/	No	No	Mild. I was still able to do most daily activities	No	No	No	No	No	No	1-3 days after	That same day	Not Experienced	That same day	That same day	That same day	That same day	Not Experienced	Not Experienced	Not Experienced	Not Experienced	Not Experienced	Not Experienced	Not Experienced	Not Experienced	Not Experienced	Not Experienced	Not Experienced	4-7 days	1-3 days	Not Experienced
Yes, only first dose	Covishield/Astrazeneca	No		Female	21	Undergraduate	Yea 4	Dentistry	No illness	No (Please go to Question 17)
Yes, 1st and 2nd doses	Covishield/Astrazeneca	Yes, tested positive (RT-PCR)	Between 1st dose and 2nd dose of vaccination	Female	22	Undergraduate	Yea 4	Dentistry	No illness	No (Please go to Question 17)
Yes, 1st and 2nd doses	Covishield/Astrazeneca	No		Female	21	Undergraduate	Yea 4	Dentistry	No illness	No (Please go to Question 17)
Yes, 1st and 2nd doses	Covishield/Astrazeneca	No		Female	21	Undergraduate	Yea 4	Dentistry	No illness	Yes	Mild. I was still able to do most daily activities		Mild. I was still able to do most daily activities	Mild. I was still able to do most daily activities			Mild. I was still able to do most daily activities												That same day		That same day	That same day			That same day												1-3 days		1-3 days
Yes, 1st and 2nd doses	Covishield/Astrazeneca	No		Female	19	Undergraduate	Year 2	Dentistry	No illness	Yes	Moderate. I had to stop my daily activities	Moderate. I had to stop my daily activities	Moderate. I had to stop my daily activities	Moderate. I had to stop my daily activities	No	Moderate. I had to stop my daily activities	Moderate. I had to stop my daily activities	No	No	No	No	Moderate. I had to stop my daily activities	No	No	No	No	No	No	1-3 days after	1-3 days after	1-3 days after	1-3 days after	Not Experienced	Not Experienced	1-3 days after	Not Experienced	Not Experienced	Not Experienced	Not Experienced	1-3 days after	Not Experienced	Not Experienced	Not Experienced	Not Experienced	Not Experienced	Not Experienced	1-3 days	1-3 days	1-3 days
Yes, 1st and 2nd doses	Covishield/Astrazeneca	No		Female	22	Undergraduate	CRRI/Intern	Dentistry	No illness	Yes	Mild. I was still able to do most daily activities	Not sure/	Mild. I was still able to do most daily activities	Moderate. I had to stop my daily activities	No	Mild. I was still able to do most daily activities	Mild. I was still able to do most daily activities	No	No	No	No	No	No	No	No	No	No	No	That same day	Not Experienced	That same day	That same day	Not Experienced	That same day	1-3 days after	Not Experienced	Not Experienced	Not Experienced	Not Experienced	Not Experienced	Not Experienced	Not Experienced	Not Experienced	Not Experienced	Not Experienced	Not Experienced	1-3 days	Not Experienced	1-3 days
Yes, 1st and 2nd doses	Covishield/Astrazeneca	No		Female	19 years	Undergraduate	Year 2	Dentistry	No illness	Yes	Moderate. I had to stop my daily activities		Moderate. I had to stop my daily activities			Moderate. I had to stop my daily activities	Moderate. I had to stop my daily activities												1-3 days after		1-3 days after			1-3 days after	1-3 days after												4-7 days		4-7 days
Yes, 1st and 2nd doses	Covishield/Astrazeneca	No		Female	21	Undergraduate	Year 2	Dentistry	No illness	Yes	Mild. I was still able to do most daily activities	No	Mild. I was still able to do most daily activities	Moderate. I had to stop my daily activities	No	No	No	No	No	No	No	No	No	No	No	No	No	No	That same day	Not Experienced	That same day	That same day	Not Experienced	Not Experienced	Not Experienced	Not Experienced	Not Experienced	Not Experienced	Not Experienced	Not Experienced	Not Experienced	Not Experienced	Not Experienced	Not Experienced	Not Experienced	Not Experienced	1-3 days	Not Experienced	1-3 days
Yes, 1st and 2nd doses	Covishield/Astrazeneca	No		Female	19	Undergraduate	Year 2	Dentistry	No illness	No (Please go to Question 17)
Yes, 1st and 2nd doses	Covishield/Astrazeneca	No		Female	20	Undergraduate	Year 3	Dentistry	No illness	Yes			Moderate. I had to stop my daily activities	Moderate. I had to stop my daily activities		Moderate. I had to stop my daily activities															That same day	That same day		That same day															That same day
Yes, only first dose	Covishield/Astrazeneca	No		Female	20	Undergraduate	Year 3	Dentistry	No illness	Yes	Mild. I was still able to do most daily activities	Moderate. I had to stop my daily activities	Moderate. I had to stop my daily activities	Severe! I had to seek medical attention	No	Moderate. I had to stop my daily activities	Moderate. I had to stop my daily activities	No	No	No	No	Moderate. I had to stop my daily activities	No	No	No	No	Moderate. I had to stop my daily activities	Moderate. I had to stop my daily activities	That same day	That same day	That same day	That same day	That same day	That same day	That same day	That same day	That same day	That same day	That same day	That same day	That same day	That same day	That same day	That same day	That same day	That same day	4-7 days	4-7 days	4-7 days
Yes, 1st and 2nd doses	Covishield/Astrazeneca	No		Female	19	Undergraduate	Year 1	Dentistry	No illness	No (Please go to Question 17)
Yes, 1st and 2nd doses	Covishield/Astrazeneca	No		Female	20	Undergraduate	Year 3	Dentistry	No illness	Yes	Mild. I was still able to do most daily activities	Mild. I was still able to do most daily activities	No	Mild. I was still able to do most daily activities	No	Mild. I was still able to do most daily activities	Mild. I was still able to do most daily activities	No	No	No	Not sure/	No	No	No		No	No	No	That same day	That same day	Not Experienced	That same day	Not Experienced	1-3 days after	1-3 days after	Not Experienced	Not Experienced	Not Experienced	Not Experienced	Not Experienced	Not Experienced	Not Experienced	Not Experienced	Not Experienced	Not Experienced	Not Experienced	4-7 days	4-7 days	Not Experienced
Yes, 1st and 2nd doses	Covishield/Astrazeneca	No		Female	21	Undergraduate	Year 3	Dentistry	No illness	Yes	Mild. I was still able to do most daily activities					Mild. I was still able to do most daily activities	Mild. I was still able to do most daily activities												That same day											1-3 days after							1-3 days
Yes, only first dose	Covishield/Astrazeneca	No		Female	22		CRRI/Intern	Dentistry	No illness	Yes	Severe! I had to seek medical attention		Moderate. I had to stop my daily activities	Severe! I had to seek medical attention			Moderate. I had to stop my daily activities										Severe! I had to seek medical attention																				1-3 days		That same day
Yes, 1st and 2nd doses	Covishield/Astrazeneca	No		Female	20	Undergraduate	Year 3	Dentistry	No illness	Yes	Moderate. I had to stop my daily activities	Moderate. I had to stop my daily activities	Moderate. I had to stop my daily activities	Moderate. I had to stop my daily activities	No	Moderate. I had to stop my daily activities	Moderate. I had to stop my daily activities	No	Not sure/	No	Not sure/	Moderate. I had to stop my daily activities	No	No	No	No	No	No	That same day	1-3 days after	That same day	That same day	Not Experienced	That same day	That same day	Not Experienced	4-7 days after	Not Experienced	Not Experienced	That same day	Not Experienced	Not Experienced	Not Experienced	Not Experienced	Not Experienced	Not Experienced	1-3 days	1-3 days	1-3 days
Not yet (PLEASE DISCONTINUE THE SURVEY)
Yes, 1st and 2nd doses	Covishield/Astrazeneca	No		Female	22	Undergraduate	CRRI/Intern	Dentistry	No illness	Yes	Mild. I was still able to do most daily activities		Severe! I had to seek medical attention	Moderate. I had to stop my daily activities	No	Moderate. I had to stop my daily activities	Moderate. I had to stop my daily activities	No	Not sure/	No	Not sure/	No	No	No	Mild. I was still able to do most daily activities	No	No	No	That same day	That same day	That same day	That same day	Not Experienced	That same day	That same day	Not Experienced	Not Experienced	Not Experienced	Not Experienced	Not Experienced	Not Experienced	Not Experienced	1-3 days after	1-3 days after	Not Experienced	Not Experienced	1-3 days	1-3 days	That same day
Yes, only first dose	Covishield/Astrazeneca	Yes, tested positive (RT-PCR)	Between 1st dose and 2nd dose of vaccination	Female	19	Undergraduate	Year 2	Dentistry	No illness	No (Please go to Question 17)
Yes, 1st and 2nd doses	Covishield/Astrazeneca	Yes, tested positive (RT-PCR)	After the 2nd dose of vaccination	Female	22	Undergraduate	CRRI/Intern	Dentistry	No illness	Yes	Moderate. I had to stop my daily activities		Moderate. I had to stop my daily activities	Moderate. I had to stop my daily activities		Severe! I had to seek medical attention	Severe! I had to seek medical attention					Moderate. I had to stop my daily activities							1-3 days after		That same day	That same day															1-3 days	1-3 days	1-3 days
Yes, only first dose	Covishield/Astrazeneca	No		Female	19	Undergraduate	Year 2	Dentistry	No illness	Yes	Moderate. I had to stop my daily activities	Moderate. I had to stop my daily activities	Moderate. I had to stop my daily activities	Moderate. I had to stop my daily activities	No	Moderate. I had to stop my daily activities	Mild. I was still able to do most daily activities	No	Not sure/	Not sure/	Not sure/	Moderate. I had to stop my daily activities	No	No	No	No	No	No	That same day	That same day	That same day	That same day	Not Experienced	That same day	That same day	Not Experienced	Not Experienced	Not Experienced	Not Experienced	That same day	Not Experienced	Not Experienced	Not Experienced	Not Experienced	Not Experienced	Not Experienced	That same day	That same day	That same day
Yes, 1st and 2nd doses	Covishield/Astrazeneca	No		Female	21	Undergraduate	Yea 4	Dentistry	No illness	Yes	Mild. I was still able to do most daily activities	No	Mild. I was still able to do most daily activities	No	No	No	No	No	No	Not sure/	No	No	No	No	No	Not sure/	No	No	That same day	Not Experienced	1-3 days after	Not Experienced	Not Experienced	Not Experienced	Not Experienced	Not Experienced	Not Experienced	Not Experienced	Not Experienced	Not Experienced	Not Experienced	Not Experienced	Not Experienced	Not Experienced	Not Experienced	Not Experienced	1-3 days	Not Experienced	1-3 days
Not yet (PLEASE DISCONTINUE THE SURVEY)
Yes, 1st and 2nd doses	Covishield/Astrazeneca	Yes, tested positive (RT-PCR)	Between 1st dose and 2nd dose of vaccination	Female	19	Undergraduate	Year 2	Dentistry	No illness	Yes	Mild. I was still able to do most daily activities	Mild. I was still able to do most daily activities	Moderate. I had to stop my daily activities	No	No	Mild. I was still able to do most daily activities	Moderate. I had to stop my daily activities	No	No	No	Not sure/	No	No	No	No	No	No	No	That same day	That same day	1-3 days after	Not Experienced	Not Experienced	1-3 days after	That same day	Not Experienced	Not Experienced	4-7 days after	4-7 days after	Not Experienced	Not Experienced	Not Experienced	Not Experienced	Not Experienced	Not Experienced	Not Experienced	4-7 days	4-7 days	That same day
Yes, 1st and 2nd doses	Covishield/Astrazeneca	No		Male	23	Undergraduate	CRRI/Intern	Dentistry	No illness	Yes	Moderate. I had to stop my daily activities	Mild. I was still able to do most daily activities	Severe! I had to seek medical attention	Moderate. I had to stop my daily activities	No	Severe! I had to seek medical attention	Severe! I had to seek medical attention	No	Moderate. I had to stop my daily activities	No	No	No	No	No	No	No	No	No	That same day	Not Experienced	That same day	That same day	Not Experienced	That same day	That same day	Not Experienced	1-3 days after	Not Experienced	Not Experienced	Not Experienced	Not Experienced	Not Experienced	Not Experienced	Not Experienced	Not Experienced	Not Experienced	1-3 days	Not Experienced	1-3 days
Not yet (PLEASE DISCONTINUE THE SURVEY)
Yes, 1st and 2nd doses	Covishield/Astrazeneca	No		Female	20	Undergraduate	Year 2	Medicine	Asthma	Yes	Moderate. I had to stop my daily activities	Severe! I had to seek medical attention	Severe! I had to seek medical attention	Mild. I was still able to do most daily activities	Mild. I was still able to do most daily activities	Moderate. I had to stop my daily activities	Moderate. I had to stop my daily activities	No	No	No	No	Severe! I had to seek medical attention	No	No	No	No	No	No	That same day	That same day	That same day	That same day	That same day	That same day	1-3 days after	Not Experienced	Not Experienced	Not Experienced	Not Experienced	1-3 days after	Not Experienced	Not Experienced	Not Experienced	Not Experienced	Not Experienced	Not Experienced	4-7 days	1-3 days	1-3 days
Not yet (PLEASE DISCONTINUE THE SURVEY)
Yes, only first dose	Covishield/Astrazeneca	Yes, tested positive (RT-PCR)	Between 1st dose and 2nd dose of vaccination	Female	21	Undergraduate	Yea 4	Dentistry	No illness	No (Please go to Question 17)
Yes, 1st and 2nd doses	Covishield/Astrazeneca	Yes, tested positive (RT-PCR)	Before the 1st dose of vaccination	Female	21	Undergraduate	Yea 4	Dentistry	No illness	Yes	Moderate. I had to stop my daily activities	Moderate. I had to stop my daily activities	Moderate. I had to stop my daily activities	No	No	Moderate. I had to stop my daily activities													That same day	1-3 days after	1-3 days after	Not Experienced	Not Experienced	1-3 days after													4-7 days	1-3 days	1-3 days
Yes, 1st and 2nd doses	Covishield/Astrazeneca	Yes, tested positive (RT-PCR)	After the 2nd dose of vaccination	Female	20	Undergraduate	Year 2	Dentistry	No illness	Yes	Moderate. I had to stop my daily activities	Mild. I was still able to do most daily activities	Severe! I had to seek medical attention	No	No	Moderate. I had to stop my daily activities	Severe! I had to seek medical attention	No	No	No	No	Moderate. I had to stop my daily activities	No	No	No	No	No	No	That same day	That same day	That same day	Not Experienced	Not Experienced	Not Experienced	That same day	Not Experienced	Not Experienced	Not Experienced	Not Experienced		Not Experienced	Not Experienced	Not Experienced	Not Experienced	Not Experienced	Not Experienced	1-3 days	1-3 days	1-3 days
Yes, 1st and 2nd doses	Covishield/Astrazeneca	No		Female	19	Undergraduate	Year 2	Dentistry	No illness	No (Please go to Question 17)
Yes, 1st and 2nd doses	Covishield/Astrazeneca	No		Male	20	Undergraduate	Year 2	Dentistry	No illness	No (Please go to Question 17)
Yes, 1st and 2nd doses	Covishield/Astrazeneca	No		Male	22	Undergraduate	CRRI/Intern	Dentistry	No illness	No (Please go to Question 17)
Yes, only first dose	Covishield/Astrazeneca	Yes, tested positive (CT)	Between 1st dose and 2nd dose of vaccination	Female	19	Undergraduate	Year 2	Dentistry	No illness	Yes	No	Severe! I had to seek medical attention	Not sure/	Severe! I had to seek medical attention	No	Severe! I had to seek medical attention	Severe! I had to seek medical attention	No		No	Severe! I had to seek medical attention	No	No	No	No	No	Severe! I had to seek medical attention	No	Not Experienced	That same day	Not Experienced	That same day	Not Experienced	That same day	That same day	Not Experienced	Not Experienced	Not Experienced	Not Experienced	Not Experienced	Not Experienced	Not Experienced	Not Experienced	Not Experienced	That same day	Not Experienced	Not Experienced	1-3 days	Not Experienced
Not yet (PLEASE DISCONTINUE THE SURVEY)
Yes, 1st and 2nd doses	Covishield/Astrazeneca	No		Female	21	Undergraduate	Year 3	Dentistry	No illness	No (Please go to Question 17)
Yes, 1st and 2nd doses	Covishield/Astrazeneca	No		Male	22	Undergraduate	Year 3	Dentistry	No illness	Yes	Mild. I was still able to do most daily activities	No	No	No	No	Mild. I was still able to do most daily activities	No	No	No	No	No	No	No	No	No	No	No	No	That same day	Not Experienced	Not Experienced	Not Experienced	Not Experienced	That same day	Not Experienced	Not Experienced	Not Experienced	Not Experienced	Not Experienced	Not Experienced	Not Experienced	Not Experienced	Not Experienced	Not Experienced	Not Experienced	Not Experienced	That same day	Not Experienced	Not Experienced
Yes, 1st and 2nd doses	Covishield/Astrazeneca	No		Female	19	Undergraduate	Year 2	Dentistry	No illness	Yes	Mild. I was still able to do most daily activities	Moderate. I had to stop my daily activities	Severe! I had to seek medical attention	Severe! I had to seek medical attention		Moderate. I had to stop my daily activities	Moderate. I had to stop my daily activities					Mild. I was still able to do most daily activities					Mild. I was still able to do most daily activities		Not Experienced	That same day	1-3 days after	That same day	Not Experienced	1-3 days after	1-3 days after	Not Experienced	Not Experienced	Not Experienced	Not Experienced	1-3 days after	Not Experienced	Not Experienced	Not Experienced	Not Experienced	1-3 days after	Not Experienced	Not Experienced	1-3 days	1-3 days
Yes, 1st and 2nd doses	Covishield/Astrazeneca	No		Female	19	Undergraduate	Year 2	Dentistry	No illness	Yes				Severe! I had to seek medical attention		Severe! I had to seek medical attention	Severe! I had to seek medical attention				Severe! I had to seek medical attention							Severe! I had to seek medical attention
Not yet (PLEASE DISCONTINUE THE SURVEY)
Not yet (PLEASE DISCONTINUE THE SURVEY)
Yes, 1st and 2nd doses	Covishield/Astrazeneca	No		Male	22	Undergraduate	Yea 4	Dentistry	No illness	No (Please go to Question 17)
Yes, 1st and 2nd doses	Covishield/Astrazeneca	No		Female	21	Undergraduate	Yea 4	Dentistry	No illness	Yes	Mild. I was still able to do most daily activities	No	Mild. I was still able to do most daily activities	Mild. I was still able to do most daily activities	No	Mild. I was still able to do most daily activities	Mild. I was still able to do most daily activities	No	No	No	No	No	No	No	No	No	No	No	1-3 days after	Not Experienced	That same day	1-3 days after	Not Experienced	That same day	1-3 days after	Not Experienced	Not Experienced	Not Experienced	Not Experienced		Not Experienced	Not Experienced	Not Experienced	Not Experienced	Not Experienced	Not Experienced	1-3 days	Not Experienced	1-3 days
Not yet (PLEASE DISCONTINUE THE SURVEY)
Yes, 1st and 2nd doses	Covishield/Astrazeneca	No		Female	19	Undergraduate	Year 2	Dentistry	No illness	No (Please go to Question 17)
Yes, 1st and 2nd doses	Covishield/Astrazeneca	No		Female	19	Undergraduate	Year 2	Dentistry	No illness	Yes	No	No	Mild. I was still able to do most daily activities	Mild. I was still able to do most daily activities	No		No	No	No	No	No	No	No	No	No	No	No	No	That same day	Not Experienced	Not Experienced	Not Experienced	Not Experienced	Not Experienced	Not Experienced	Not Experienced	Not Experienced	Not Experienced	Not Experienced	Not Experienced	Not Experienced	Not Experienced	Not Experienced	Not Experienced	Not Experienced	Not Experienced	Not Experienced	Not Experienced	Not Experienced
Yes, only first dose	Covishield/Astrazeneca	Yes, tested positive (RT-PCR)	Between 1st dose and 2nd dose of vaccination	Female	19	Undergraduate	Year 2	Dentistry	No illness	No (Please go to Question 17)
Yes, 1st and 2nd doses	Covishield/Astrazeneca	No		Female	19	Undergraduate	Year 2	Dentistry	No illness	Yes	Moderate. I had to stop my daily activities	Moderate. I had to stop my daily activities	Moderate. I had to stop my daily activities	Mild. I was still able to do most daily activities	No	Moderate. I had to stop my daily activities	Mild. I was still able to do most daily activities	No	Not sure/	No	Mild. I was still able to do most daily activities	Moderate. I had to stop my daily activities	No	No	No	No	No	No	That same day	That same day	That same day	That same day	Not Experienced	That same day	That same day	Not Experienced	4-7 days after	Not Experienced	Not Experienced	Not Experienced	1-3 days after	Not Experienced	Not Experienced	Not Experienced	Not Experienced	Not Experienced	1-3 days	That same day	That same day
Yes, 1st and 2nd doses	Covishield/Astrazeneca	No		Female	18	Undergraduate	Year 1	Dentistry	No illness	Yes	Mild. I was still able to do most daily activities	Mild. I was still able to do most daily activities	Mild. I was still able to do most daily activities	No	No	Mild. I was still able to do most daily activities	Mild. I was still able to do most daily activities	No	Not sure/	No		No	No	No	No	No	Mild. I was still able to do most daily activities	No	That same day	That same day	That same day	Not Experienced	Not Experienced	That same day	Not Experienced	Not Experienced	Not Experienced	Not Experienced	Not Experienced	Not Experienced	Not Experienced	Not Experienced	Not Experienced	Not Experienced	That same day	Not Experienced	1-3 days	1-3 days	That same day
Not yet (PLEASE DISCONTINUE THE SURVEY)
Yes, 1st and 2nd doses	Covishield/Astrazeneca	No		Female	21	Undergraduate	Year 2	Dentistry	No illness	Yes	No	No	Severe! I had to seek medical attention	No	No	No	No	No	No	No	No	No	No	No	No	No	No	No	Not Experienced	Not Experienced	1-3 days after	Not Experienced	Not Experienced	Not Experienced	Not Experienced	Not Experienced	Not Experienced	Not Experienced	Not Experienced	Not Experienced	Not Experienced	Not Experienced	Not Experienced	Not Experienced	Not Experienced		Not Experienced	Not Experienced	1-3 days
Yes, 1st and 2nd doses	Covishield/Astrazeneca	No		Female	20	Undergraduate	Year 3	Dentistry	No illness	No (Please go to Question 17)
Yes, only first dose	Covishield/Astrazeneca	Yes, tested positive (RT-PCR)	Between 1st dose and 2nd dose of vaccination	Female	19	Undergraduate	Year 1	Dentistry	No illness	No (Please go to Question 17)
Yes, 1st and 2nd doses	Covishield/Astrazeneca	No		Female	20	Undergraduate	Year 2	Dentistry	No illness	Yes	Moderate. I had to stop my daily activities	Not sure/	Mild. I was still able to do most daily activities	Mild. I was still able to do most daily activities	No	Moderate. I had to stop my daily activities	Moderate. I had to stop my daily activities	No	No	No	Not sure/	No	No	No	No	No	No	No	That same day	4-7 days after	That same day	That same day	Not Experienced	That same day	That same day	Not Experienced	Not Experienced	Not Experienced	1-3 days after	That same day	Not Experienced	Not Experienced	Not Experienced	Not Experienced	Not Experienced	Not Experienced	4-7 days	4-7 days	1-3 days
Yes, 1st and 2nd doses	Covishield/Astrazeneca	Yes, tested positive (RT-PCR)	Between 1st dose and 2nd dose of vaccination	Female	21	Undergraduate	Yea 4	Dentistry	No illness	Yes	Mild. I was still able to do most daily activities		Mild. I was still able to do most daily activities	Mild. I was still able to do most daily activities		Mild. I was still able to do most daily activities	Mild. I was still able to do most daily activities					Mild. I was still able to do most daily activities							That same day	1-3 days after	That same day	That same day	Not Experienced	1-3 days after	1-3 days after	Not Experienced	Not Experienced	Not Experienced	Not Experienced	That same day	Not Experienced	Not Experienced	Not Experienced	Not Experienced	Not Experienced	Not Experienced	1-3 days	That same day	That same day
Yes, 1st and 2nd doses	Covishield/Astrazeneca	No		Female	21	Undergraduate	Year 3	Dentistry	No illness	Yes						Mild. I was still able to do most daily activities																		1-3 days after
Yes, 1st and 2nd doses	Covishield/Astrazeneca	Yes, never tested (symptomatic)		Female	21	Undergraduate	Year 2	Dentistry	No illness	No (Please go to Question 17)
Yes, 1st and 2nd doses	Covishield/Astrazeneca	No		Female	22	Undergraduate	CRRI/Intern	Dentistry	No illness	Yes	Moderate. I had to stop my daily activities	Mild. I was still able to do most daily activities	Moderate. I had to stop my daily activities	Moderate. I had to stop my daily activities		Moderate. I had to stop my daily activities	Moderate. I had to stop my daily activities												That same day	That same day	That same day	That same day		That same day													4-7 days	4-7 days	1-3 days
Yes, 1st and 2nd doses	Covishield/Astrazeneca	No		Female	19	Undergraduate	Year 2	Dentistry	No illness	No (Please go to Question 17)
Yes, 1st and 2nd doses	Covishield/Astrazeneca	No		Male	22	Undergraduate	CRRI/Intern	Dentistry	No illness	No (Please go to Question 17)
Yes, 1st and 2nd doses	Covishield/Astrazeneca	No		Male	20	Undergraduate	Year 3	Dentistry	No illness	No (Please go to Question 17)
Yes, only first dose	Covishield/Astrazeneca	Yes, tested positive (RT-PCR)	Between 1st dose and 2nd dose of vaccination	Female	20	Undergraduate		Dentistry	No illness	No (Please go to Question 17)
Yes, 1st and 2nd doses	Covishield/Astrazeneca	No		Female	20	Undergraduate	Year 2	Dentistry	No illness	Yes	Moderate. I had to stop my daily activities	No	Mild. I was still able to do most daily activities	Mild. I was still able to do most daily activities	No	Mild. I was still able to do most daily activities	Moderate. I had to stop my daily activities	No	No	No	No	No	No	No	No	No	No	No																			1-3 days		That same day
Yes, 1st and 2nd doses	Covishield/Astrazeneca	No		Female	19	Undergraduate	Year 2	Dentistry	No illness	No (Please go to Question 17)
Yes, 1st and 2nd doses	Covishield/Astrazeneca	No		Female	20	Undergraduate	Year 3	Dentistry	No illness	Yes	Moderate. I had to stop my daily activities	Moderate. I had to stop my daily activities	Moderate. I had to stop my daily activities	Severe! I had to seek medical attention	No	Severe! I had to seek medical attention	Severe! I had to seek medical attention	No	No	No	No	Moderate. I had to stop my daily activities	No	No	Mild. I was still able to do most daily activities	No	Mild. I was still able to do most daily activities	Mild. I was still able to do most daily activities	1-3 days after	1-3 days after	That same day	1-3 days after	Not Experienced	4-7 days after	4-7 days after	Not Experienced	Not Experienced	Not Experienced	Not Experienced	1-3 days after	Not Experienced	Not Experienced	1-3 days after	Not Experienced	Not Experienced	Not Experienced	1-3 days	1-3 days	1-3 days
Not yet (PLEASE DISCONTINUE THE SURVEY)
Yes, 1st and 2nd doses	Covaxin (India)	No		Female	23	Undergraduate	CRRI/Intern	Dentistry	No illness	Yes	Mild. I was still able to do most daily activities	Moderate. I had to stop my daily activities	Moderate. I had to stop my daily activities	Moderate. I had to stop my daily activities	No	Moderate. I had to stop my daily activities	Mild. I was still able to do most daily activities	No	No	No	No	No	No	No	No	Mild. I was still able to do most daily activities	Mild. I was still able to do most daily activities	Mild. I was still able to do most daily activities	That same day	1-3 days after	1-3 days after	That same day	Not Experienced	That same day	Not Experienced	Not Experienced	Not Experienced	Not Experienced	Not Experienced	Not Experienced	Not Experienced	Not Experienced	Not Experienced	1-3 days after	1-3 days after	1-3 days after	1-3 days	4-7 days	1-3 days
Yes, 1st and 2nd doses	Covishield/Astrazeneca	No		Female	21	Undergraduate	Year 3	Dentistry	No illness	Yes	Mild. I was still able to do most daily activities	Mild. I was still able to do most daily activities	Mild. I was still able to do most daily activities	Moderate. I had to stop my daily activities	No	Moderate. I had to stop my daily activities	Moderate. I had to stop my daily activities	Mild. I was still able to do most daily activities	Moderate. I had to stop my daily activities	No	Not sure/	Moderate. I had to stop my daily activities	Not sure/	Mild. I was still able to do most daily activities	Mild. I was still able to do most daily activities	No	Moderate. I had to stop my daily activities	No	That same day	1-3 days after	1-3 days after	1-3 days after	Not Experienced	1-3 days after	1-3 days after	Not Experienced	Not Experienced	Not Experienced	Not Experienced	That same day	That same day	That same day	1-3 days after	1-3 days after	1-3 days after	Not Experienced	That same day	1-3 days	1-3 days
Yes, only first dose	Covishield/Astrazeneca	Yes, tested positive (RT-PCR)	Between 1st dose and 2nd dose of vaccination	Female	20	Undergraduate	Year 3	Dentistry	No illness;Obesity	Yes	Moderate. I had to stop my daily activities	Not sure/	Severe! I had to seek medical attention	Moderate. I had to stop my daily activities	No	Mild. I was still able to do most daily activities		Mild. I was still able to do most daily activities	Not sure/	Not sure/	No	Mild. I was still able to do most daily activities	No	Mild. I was still able to do most daily activities	No	No	No	No	That same day	Not Experienced	1-3 days after	1-3 days after		1-3 days after	1-3 days after	1-3 days after	Not Experienced	Not Experienced	Not Experienced	1-3 days after	Not Experienced	4-7 days after	Not Experienced	Not Experienced	Not Experienced	Not Experienced	4-7 days	Not Experienced	1-3 days
Yes, 1st and 2nd doses	Covishield/Astrazeneca	No		Male	20	Undergraduate		Dentistry		Yes			Moderate. I had to stop my daily activities																		That same day																		That same day
Yes, 1st and 2nd doses	Covishield/Astrazeneca	Yes, tested positive (RT-PCR)	Before the 1st dose of vaccination	Female	19	Undergraduate		Dentistry	No illness	Yes	Moderate. I had to stop my daily activities	Moderate. I had to stop my daily activities		Mild. I was still able to do most daily activities		Severe! I had to seek medical attention	Mild. I was still able to do most daily activities					Moderate. I had to stop my daily activities			Severe! I had to seek medical attention				1-3 days after	1-3 days after													1-3 days after				1-3 days
Yes, only first dose	Covishield/Astrazeneca	No		Female	22	Undergraduate	CRRI/Intern	Dentistry	No illness	No (Please go to Question 17)
Not yet (PLEASE DISCONTINUE THE SURVEY)
Yes, 1st and 2nd doses	Covishield/Astrazeneca	No		Female	22	Undergraduate	CRRI/Intern	Dentistry	No illness	Yes	Mild. I was still able to do most daily activities	Mild. I was still able to do most daily activities	Mild. I was still able to do most daily activities	Mild. I was still able to do most daily activities		Mild. I was still able to do most daily activities	Mild. I was still able to do most daily activities												1-3 days after	1-3 days after	1-3 days after	1-3 days after		1-3 days after	1-3 days after												1-3 days	1-3 days	1-3 days
Yes, 1st and 2nd doses	Covishield/Astrazeneca	No		Female	20	Undergraduate	Year 2	Dentistry	No illness	Yes	Mild. I was still able to do most daily activities	Mild. I was still able to do most daily activities	Mild. I was still able to do most daily activities	Mild. I was still able to do most daily activities	No	Mild. I was still able to do most daily activities	Mild. I was still able to do most daily activities	No	No	No	No	No	No	No	No	No	No	No	That same day	That same day	That same day	That same day	Not Experienced	That same day	That same day	Not Experienced	Not Experienced	Not Experienced	Not Experienced	Not Experienced	Not Experienced	Not Experienced	Not Experienced	Not Experienced	Not Experienced	Not Experienced	1-3 days	1-3 days	1-3 days
Yes, 1st and 2nd doses	Covishield/Astrazeneca	No		Male	22	Undergraduate	CRRI/Intern	Dentistry	No illness	Yes	Mild. I was still able to do most daily activities	Not sure/	Moderate. I had to stop my daily activities	Mild. I was still able to do most daily activities	No	Moderate. I had to stop my daily activities	Mild. I was still able to do most daily activities	No	No	Not sure/	Not sure/	No	No	No	No	No	No	No	That same day	Not Experienced	That same day	That same day	Not Experienced	That same day	That same day	Not Experienced	Not Experienced	Not Experienced	Not Experienced	Not Experienced	Not Experienced	Not Experienced	Not Experienced	Not Experienced	Not Experienced	Not Experienced	That same day	That same day	That same day
Yes, 1st and 2nd doses	Covishield/Astrazeneca	No		Male	19	Undergraduate	Year 1	Medicine	No illness	Yes			Severe! I had to seek medical attention																That same day	That same day	That same day	That same day		That same day	That same day					That same day	That same day	That same day					1-3 days	1-3 days	1-3 days
Not yet (PLEASE DISCONTINUE THE SURVEY)
Not yet (PLEASE DISCONTINUE THE SURVEY)
Yes, 1st and 2nd doses	Covishield/Astrazeneca	No		Female	22	Undergraduate	CRRI/Intern	Dentistry	No illness	Yes	Moderate. I had to stop my daily activities	Moderate. I had to stop my daily activities	Moderate. I had to stop my daily activities	Not sure/	No	Mild. I was still able to do most daily activities	Not sure/	No	No	No									1-3 days after	1-3 days after	1-3 days after	1-3 days after															1-3 days	1-3 days	1-3 days
Not yet (PLEASE DISCONTINUE THE SURVEY)
Yes, 1st and 2nd doses	Covishield/Astrazeneca	No		Male	19	Undergraduate		Dentistry		Yes
Yes, 1st and 2nd doses	Covishield/Astrazeneca	No		Female	18+	Undergraduate	Year 1	Medicine	No illness	No (Please go to Question 17)
Not yet (PLEASE DISCONTINUE THE SURVEY)
Yes, 1st and 2nd doses	Covishield/Astrazeneca	No		Female	20	Undergraduate	Year 3	Dentistry	No illness	Yes	Moderate. I had to stop my daily activities	Mild. I was still able to do most daily activities	Moderate. I had to stop my daily activities	Mild. I was still able to do most daily activities		Mild. I was still able to do most daily activities	Severe! I had to seek medical attention		Severe! I had to seek medical attention		Mild. I was still able to do most daily activities	Moderate. I had to stop my daily activities	Mild. I was still able to do most daily activities	Moderate. I had to stop my daily activities
Yes, only first dose	Covishield/Astrazeneca	Yes, tested positive (RT-PCR)	Between 1st dose and 2nd dose of vaccination	Female	22	Undergraduate	CRRI/Intern	Dentistry	No illness	No (Please go to Question 17)
Yes, 1st and 2nd doses	Covishield/Astrazeneca	No		Female	21	Undergraduate	Year 2	Dentistry	No illness	No (Please go to Question 17)
Yes, 1st and 2nd doses	Covishield/Astrazeneca	No		Female	20	Undergraduate	Year 3	Dentistry	No illness	No (Please go to Question 17)
Yes, 1st and 2nd doses	Covishield/Astrazeneca	No		Female	21	Undergraduate	Yea 4	Dentistry	No illness	Yes	Mild. I was still able to do most daily activities					Mild. I was still able to do most daily activities											Mild. I was still able to do most daily activities		That same day																		1-3 days
Yes, 1st and 2nd doses	Covishield/Astrazeneca	No		Female	19	Undergraduate	Year 2	Dentistry	No illness	Yes	Moderate. I had to stop my daily activities	Mild. I was still able to do most daily activities	No	Moderate. I had to stop my daily activities	No	Mild. I was still able to do most daily activities	Mild. I was still able to do most daily activities	No	No	No	Not sure/	Moderate. I had to stop my daily activities	No	No	No	No	No	No	1-3 days after	1-3 days after	Not Experienced	1-3 days after	Not Experienced	That same day	Not Experienced	Not Experienced	Not Experienced	Not Experienced	4-7 days after	1-3 days after	Not Experienced	Not Experienced	Not Experienced	Not Experienced	Not Experienced	Not Experienced	1-3 days	1-3 days	Not Experienced
Yes, 1st and 2nd doses	Covishield/Astrazeneca	No		Female	21	Undergraduate	Year 2	Dentistry	No illness	Yes	Moderate. I had to stop my daily activities		Moderate. I had to stop my daily activities	Mild. I was still able to do most daily activities								Moderate. I had to stop my daily activities							1-3 days after		That same day									1-3 days after							4-7 days		1-3 days
Yes, 1st and 2nd doses	Covishield/Astrazeneca	Yes, never tested (symptomatic)	Between 1st dose and 2nd dose of vaccination	Female	21	Undergraduate	Year 3	Dentistry	No illness	Yes	Mild. I was still able to do most daily activities	No	No	No	No	No	No	No	No	No	No	Mild. I was still able to do most daily activities	No	No	No	No	Moderate. I had to stop my daily activities	Moderate. I had to stop my daily activities	That same day	Not Experienced	Not Experienced	Not Experienced	Not Experienced	Not Experienced	Not Experienced	Not Experienced	Not Experienced	Not Experienced	Not Experienced	That same day	Not Experienced	Not Experienced	Not Experienced	Not Experienced	That same day	That same day	That same day	Not Experienced	Not Experienced
Yes, 1st and 2nd doses	Covishield/Astrazeneca	No		Female	22	Undergraduate	Year 3	Dentistry	No illness	No (Please go to Question 17)
Yes, 1st and 2nd doses	Covishield/Astrazeneca	No		Male	21	Undergraduate	Year 3	Dentistry	No illness	No (Please go to Question 17)
Yes, 1st and 2nd doses	Covishield/Astrazeneca	No		Male	20	Undergraduate	Year 3	Dentistry	No illness	No (Please go to Question 17)
Yes, only first dose	Covishield/Astrazeneca	No		Female	22	Undergraduate	CRRI/Intern	Dentistry	No illness	No (Please go to Question 17)
Yes, 1st and 2nd doses	Covishield/Astrazeneca	No		Female	18	Undergraduate		Dentistry	No illness	No (Please go to Question 17)
Yes, only first dose	Covishield/Astrazeneca	Yes, tested positive (RT-PCR)	Between 1st dose and 2nd dose of vaccination	Female	23	Undergraduate	CRRI/Intern	Dentistry	No illness	No (Please go to Question 17)
Yes, 1st and 2nd doses	Covishield/Astrazeneca	Yes, never tested (symptomatic)	Between 1st dose and 2nd dose of vaccination	Female	19	Undergraduate	Year 2	Dentistry	No illness	No (Please go to Question 17)
Yes, 1st and 2nd doses	Covishield/Astrazeneca	Yes, tested positive (RT-PCR)	Before the 1st dose of vaccination	Female	19	Undergraduate	Year 2	Dentistry	No illness	No (Please go to Question 17)
Not yet (PLEASE DISCONTINUE THE SURVEY)
Yes, 1st and 2nd doses	Covishield/Astrazeneca	No		Male	22	Undergraduate	CRRI/Intern	Dentistry	No illness	Yes	Mild. I was still able to do most daily activities	Mild. I was still able to do most daily activities	Mild. I was still able to do most daily activities	No	No	Mild. I was still able to do most daily activities	Mild. I was still able to do most daily activities	No	No	No	No	No	No	No	No	No	No	No	1-3 days after	That same day	That same day	Not Experienced	Not Experienced	That same day	That same day	Not Experienced	Not Experienced	Not Experienced	Not Experienced	Not Experienced	Not Experienced	Not Experienced	Not Experienced	Not Experienced	Not Experienced	Not Experienced	1-3 days	1-3 days	1-3 days
Yes, 1st and 2nd doses	Covishield/Astrazeneca	No		Female	23	Undergraduate	CRRI/Intern	Dentistry	No illness	No (Please go to Question 17)
Yes, 1st and 2nd doses	Covishield/Astrazeneca	No		Female	18	Undergraduate	Year 2	Dentistry	No illness	Yes			Mild. I was still able to do most daily activities																		That same day																		1-3 days
Yes, 1st and 2nd doses	Covishield/Astrazeneca	No	Before the 1st dose of vaccination	Female	21 years	Undergraduate	Year 3	Dentistry	No illness	Yes	Moderate. I had to stop my daily activities		Mild. I was still able to do most daily activities				Mild. I was still able to do most daily activities					Mild. I was still able to do most daily activities		Mild. I was still able to do most daily activities					That same day						That same day					That same day							4-7 days
Not yet (PLEASE DISCONTINUE THE SURVEY)
Yes, 1st and 2nd doses	Covishield/Astrazeneca	No		Female	22	Undergraduate	CRRI/Intern	Dentistry	No illness	No (Please go to Question 17)
Yes, only first dose	Covishield/Astrazeneca	No		Male	20	Undergraduate		Dentistry	No illness	Yes			Moderate. I had to stop my daily activities	Moderate. I had to stop my daily activities																	That same day	That same day																	1-3 days
Yes, 1st and 2nd doses	Covishield/Astrazeneca	No		Female	20	Undergraduate	Year 3	Dentistry	No illness	No (Please go to Question 17)
Yes, 1st and 2nd doses	Covishield/Astrazeneca	No		Female	20	Undergraduate	Year 3	Dentistry	No illness	Yes	Mild. I was still able to do most daily activities	Mild. I was still able to do most daily activities	No	Mild. I was still able to do most daily activities	No	Mild. I was still able to do most daily activities	Not sure/	No	No	No	No	No	No	No	No	No	No	No	That same day	1-3 days after	Not Experienced	That same day	Not Experienced	1-3 days after	Not Experienced	Not Experienced	Not Experienced	Not Experienced	Not Experienced	Not Experienced	Not Experienced	Not Experienced	Not Experienced	Not Experienced	Not Experienced	Not Experienced	4-7 days	1-3 days	Not Experienced
Yes, 1st and 2nd doses	Covishield/Astrazeneca	No		Female	22	Undergraduate	CRRI/Intern	Dentistry	No illness	No (Please go to Question 17)
Yes, 1st and 2nd doses	Covishield/Astrazeneca	No		Female	22	Undergraduate	CRRI/Intern	Dentistry	No illness	No (Please go to Question 17)
Yes, 1st and 2nd doses	Covishield/Astrazeneca	Yes, tested positive (RT-PCR)	After the 2nd dose of vaccination	Male	23	Undergraduate	CRRI/Intern	Dentistry	No illness	No (Please go to Question 17)
Yes, only first dose	Covishield/Astrazeneca	Yes, tested positive (RT-PCR)	Between 1st dose and 2nd dose of vaccination	Female	19	Undergraduate		Dentistry		No (Please go to Question 17)
Yes, 1st and 2nd doses	Covishield/Astrazeneca	Yes, tested positive (CT)	Before the 1st dose of vaccination	Female	19	Undergraduate		Dentistry	No illness	No (Please go to Question 17)
Yes, 1st and 2nd doses	Covishield/Astrazeneca	No		Female	20	Undergraduate	Year 3	Dentistry		Yes			Severe! I had to seek medical attention	Severe! I had to seek medical attention		Moderate. I had to stop my daily activities	Moderate. I had to stop my daily activities					Severe! I had to seek medical attention							That same day		That same day	That same day		That same day	That same day					That same day							1-3 days	1-3 days	1-3 days
Yes, 1st and 2nd doses	Covishield/Astrazeneca	No		Female	22	Undergraduate	CRRI/Intern	Dentistry	No illness	Yes	Moderate. I had to stop my daily activities	Mild. I was still able to do most daily activities	Not sure/	Not sure/	No	Not sure/	Not sure/	No	No	No	No	No	No	No	No	No	Not sure/	No	That same day	That same day	1-3 days after	1-3 days after	Not Experienced	1-3 days after	1-3 days after	Not Experienced	Not Experienced	Not Experienced	Not Experienced	Not Experienced	Not Experienced	Not Experienced	Not Experienced	Not Experienced	1-3 days after	Not Experienced	1-3 days	1-3 days	1-3 days
Yes, 1st and 2nd doses	Covaxin (India)	No		Female	21	Undergraduate	Yea 4	Dentistry	No illness	No (Please go to Question 17)
Yes, 1st and 2nd doses	Covishield/Astrazeneca	No		Female	18	Undergraduate	Year 2	Dentistry	No illness	Yes	Mild. I was still able to do most daily activities	No	Mild. I was still able to do most daily activities	No	No	No	No	No	Mild. I was still able to do most daily activities	Not sure/	Not sure/	Mild. I was still able to do most daily activities	No	Mild. I was still able to do most daily activities	No	No	No	No	4-7 days after	Not Experienced	1-3 days after	Not Experienced	Not Experienced	Not Experienced	Not Experienced	Not Experienced	1-3 days after	Not Experienced	Not Experienced	1-3 days after	Not Experienced	1-3 days after	Not Experienced	Not Experienced	Not Experienced	Not Experienced	1-3 days	Not Experienced	1-3 days
Yes, 1st and 2nd doses	Covishield/Astrazeneca	No		Female	20	Undergraduate	Year 3	Dentistry	No illness	No (Please go to Question 17)
Yes, 1st and 2nd doses	Covishield/Astrazeneca	No		Female	19	Undergraduate	Year 1	Dentistry	No illness	Yes	Moderate. I had to stop my daily activities	Mild. I was still able to do most daily activities	Moderate. I had to stop my daily activities	Moderate. I had to stop my daily activities	No	Moderate. I had to stop my daily activities	Moderate. I had to stop my daily activities	No	No	No	No	Moderate. I had to stop my daily activities	No	No	No	No	No	No	That same day	1-3 days after	That same day	That same day	Not Experienced	1-3 days after	1-3 days after	Not Experienced	Not Experienced	Not Experienced	Not Experienced	That same day	Not Experienced	Not Experienced	Not Experienced	Not Experienced	Not Experienced	Not Experienced	4-7 days	1-3 days	1-3 days
Yes, 1st and 2nd doses	Covishield/Astrazeneca	No		Female	20 years	Undergraduate	Year 3	Dentistry	No illness	Yes	Mild. I was still able to do most daily activities	Mild. I was still able to do most daily activities	Mild. I was still able to do most daily activities	Mild. I was still able to do most daily activities		Mild. I was still able to do most daily activities	Mild. I was still able to do most daily activities												That same day	That same day	That same day	That same day		1-3 days after	That same day												4-7 days	4-7 days	1-3 days
Yes, 1st and 2nd doses	Covishield/Astrazeneca	Yes, tested positive (RT-PCR)		Male	18	Undergraduate	Year 1	Dentistry	No illness	No (Please go to Question 17)
Yes, 1st and 2nd doses	Covishield/Astrazeneca	No		Male	19	Undergraduate	Year 2	Dentistry	No illness	Yes		Moderate. I had to stop my daily activities	Moderate. I had to stop my daily activities	Mild. I was still able to do most daily activities	No	Moderate. I had to stop my daily activities	Moderate. I had to stop my daily activities													4-7 days after	That same day																	4-7 days	That same day
Yes, 1st and 2nd doses	Covishield/Astrazeneca	No		Male	20	Undergraduate	Year 2	Dentistry	No illness	No (Please go to Question 17)
Yes, 1st and 2nd doses	Covishield/Astrazeneca	Yes, tested positive (RT-PCR)	Before the 1st dose of vaccination	Female	21	Undergraduate	CRRI/Intern	Dentistry	No illness	No (Please go to Question 17)
Not yet (PLEASE DISCONTINUE THE SURVEY)
Yes, only first dose	Covishield/Astrazeneca	Yes, tested positive (RT-PCR)	Between 1st dose and 2nd dose of vaccination	Female	22	Undergraduate		Dentistry		Yes	Moderate. I had to stop my daily activities	Mild. I was still able to do most daily activities	Moderate. I had to stop my daily activities	Moderate. I had to stop my daily activities		Moderate. I had to stop my daily activities	Moderate. I had to stop my daily activities					Moderate. I had to stop my daily activities							That same day	That same day	That same day	That same day															1-3 days	1-3 days	1-3 days
Yes, 1st and 2nd doses	Covishield/Astrazeneca	Yes, tested positive (RT-PCR)	After the 2nd dose of vaccination	Female	22	Undergraduate	CRRI/Intern	Dentistry	No illness	Yes	Mild. I was still able to do most daily activities	Moderate. I had to stop my daily activities	Mild. I was still able to do most daily activities	Moderate. I had to stop my daily activities	No	Moderate. I had to stop my daily activities	Moderate. I had to stop my daily activities	No	No	No	No	No	No	No	No	No	No	No	1-3 days after	1-3 days after	Not Experienced	1-3 days after	Not Experienced	1-3 days after	1-3 days after	Not Experienced	Not Experienced	Not Experienced	Not Experienced	Not Experienced	Not Experienced	Not Experienced	Not Experienced	Not Experienced	Not Experienced	Not Experienced	1-3 days	1-3 days	Not Experienced
Not yet (PLEASE DISCONTINUE THE SURVEY)
Yes, only first dose	Covishield/Astrazeneca	No		Female	19	Undergraduate	Year 1	Dentistry	No illness	No (Please go to Question 17)
Not yet (PLEASE DISCONTINUE THE SURVEY)
Not yet (PLEASE DISCONTINUE THE SURVEY)
Yes, 1st and 2nd doses	Covishield/Astrazeneca	No		Female	19	Undergraduate	Year 1	Dentistry	Bronchitis	No (Please go to Question 17)
Yes, 1st and 2nd doses	Covishield/Astrazeneca	No		Male	18	Undergraduate	Year 1	Dentistry	No illness	No (Please go to Question 17)
Not yet (PLEASE DISCONTINUE THE SURVEY)
Yes, 1st and 2nd doses	Covishield/Astrazeneca	Yes, tested positive (RT-PCR)	Between 1st dose and 2nd dose of vaccination	Female	18	Undergraduate	Year 1	Dentistry	No illness	Yes	Mild. I was still able to do most daily activities	Mild. I was still able to do most daily activities				Moderate. I had to stop my daily activities													1-3 days after	1-3 days after				1-3 days after													1-3 days	1-3 days
Not yet (PLEASE DISCONTINUE THE SURVEY)
Yes, only first dose	Covishield/Astrazeneca	No		Male	20 year	Undergraduate		Dentistry	No illness	No (Please go to Question 17)
Not yet (PLEASE DISCONTINUE THE SURVEY)
Yes, 1st and 2nd doses	Covishield/Astrazeneca	No		Female	18	Undergraduate	Year 1	Dentistry	No illness	No (Please go to Question 17)
Yes, 1st and 2nd doses	Covishield/Astrazeneca	No		Male	19	Undergraduate		Dentistry	No illness	No (Please go to Question 17)
Yes, 1st and 2nd doses	Covishield/Astrazeneca	No		Female	21	Undergraduate		Dentistry	No illness	Yes	No	Moderate. I had to stop my daily activities	No	Mild. I was still able to do most daily activities	No	Moderate. I had to stop my daily activities	No	No	Severe! I had to seek medical attention	No	No	Mild. I was still able to do most daily activities	No	No	No	No	No	No	Not Experienced	That same day	Not Experienced	1-3 days after	Not Experienced	Not Experienced	Not Experienced	Not Experienced	4-7 days after	Not Experienced	Not Experienced	Not Experienced	Not Experienced	Not Experienced	Not Experienced	Not Experienced	Not Experienced	Not Experienced	That same day	Not Experienced	Not Experienced
Yes, 1st and 2nd doses	Covishield/Astrazeneca	No		Female	21	Undergraduate		Dentistry	No illness	Yes	No	Moderate. I had to stop my daily activities	No	Mild. I was still able to do most daily activities	No	Moderate. I had to stop my daily activities	No	No	Severe! I had to seek medical attention	No	No	Mild. I was still able to do most daily activities	No	No	No	No	No	No	Not Experienced	That same day	Not Experienced	1-3 days after	Not Experienced	Not Experienced	Not Experienced	Not Experienced	4-7 days after	Not Experienced	Not Experienced	Not Experienced	Not Experienced	Not Experienced	Not Experienced	Not Experienced	Not Experienced	Not Experienced	That same day	Not Experienced	Not Experienced
Yes, only first dose	Covishield/Astrazeneca	No		Female	18	Undergraduate	Year 1	Dentistry	No illness	Yes	Not sure/	Not sure/	Moderate. I had to stop my daily activities	Mild. I was still able to do most daily activities	No	Moderate. I had to stop my daily activities	No	Moderate. I had to stop my daily activities	No	No	No	Moderate. I had to stop my daily activities	No	Moderate. I had to stop my daily activities	Moderate. I had to stop my daily activities	No	Moderate. I had to stop my daily activities	No	That same day	Not Experienced	That same day	That same day	Not Experienced	That same day	That same day	Not Experienced	Not Experienced	Not Experienced	Not Experienced	That same day	Not Experienced	That same day	That same day	Not Experienced	That same day	Not Experienced	4-7 days	Not Experienced	4-7 days
Yes, 1st and 2nd doses	Covishield/Astrazeneca	No		Male	18	Undergraduate	Year 1	Dentistry	No illness	Yes	Mild. I was still able to do most daily activities	Moderate. I had to stop my daily activities	Moderate. I had to stop my daily activities	Mild. I was still able to do most daily activities	Mild. I was still able to do most daily activities	Moderate. I had to stop my daily activities	Moderate. I had to stop my daily activities	Mild. I was still able to do most daily activities	Moderate. I had to stop my daily activities	Mild. I was still able to do most daily activities	Mild. I was still able to do most daily activities	Moderate. I had to stop my daily activities	Mild. I was still able to do most daily activities	Mild. I was still able to do most daily activities	Mild. I was still able to do most daily activities	Mild. I was still able to do most daily activities	Mild. I was still able to do most daily activities	Mild. I was still able to do most daily activities	That same day	Not Experienced	Not Experienced	Not Experienced	Not Experienced	That same day	That same day	Not Experienced	That same day	1-3 days after	Not Experienced	1-3 days after	Not Experienced	Not Experienced	Not Experienced	Not Experienced	Not Experienced	Not Experienced	1-3 days	That same day	That same day
Yes, 1st and 2nd doses	Covishield/Astrazeneca	No		Female	21	Undergraduate	Year 1	Medicine	Obesity;Asthma;Hypothyroidism	No (Please go to Question 17)
Yes, 1st and 2nd doses	Covishield/Astrazeneca	No		Female	20	Undergraduate	Year 1	Dentistry	No illness	Yes	Severe! I had to seek medical attention	Severe! I had to seek medical attention	Severe! I had to seek medical attention	Severe! I had to seek medical attention		Severe! I had to seek medical attention		Severe! I had to seek medical attention				Severe! I had to seek medical attention			Severe! I had to seek medical attention		Severe! I had to seek medical attention	Severe! I had to seek medical attention	That same day	That same day	That same day	That same day		That same day		That same day				That same day			That same day		That same day	That same day	1-3 days	1-3 days	1-3 days
Yes, 1st and 2nd doses	Covishield/Astrazeneca	Yes, tested positive (RT-PCR)	After the 2nd dose of vaccination	Female	22	Undergraduate	CRRI/Intern	Dentistry	No illness	Yes	Mild. I was still able to do most daily activities	Moderate. I had to stop my daily activities	Mild. I was still able to do most daily activities	Moderate. I had to stop my daily activities	No	Moderate. I had to stop my daily activities	Moderate. I had to stop my daily activities	No	No	No	No	No	No	No	No	No	No	No	1-3 days after	1-3 days after	Not Experienced	1-3 days after	Not Experienced	1-3 days after	1-3 days after	Not Experienced	Not Experienced	Not Experienced	Not Experienced	Not Experienced	Not Experienced	Not Experienced	Not Experienced	Not Experienced	Not Experienced	Not Experienced	1-3 days	1-3 days	Not Experienced
Yes, 1st and 2nd doses	Covishield/Astrazeneca	No		Female	22	Undergraduate	Year 1	Medicine	No illness	No (Please go to Question 17)
Yes, 1st and 2nd doses	Covishield/Astrazeneca	No		Male	20	Undergraduate	Year 1	Dentistry		No (Please go to Question 17)
Yes, 1st and 2nd doses	Covishield/Astrazeneca	No		Female	22	Undergraduate	CRRI/Intern	Dentistry	No illness	No (Please go to Question 17)
Yes, only first dose	Covishield/Astrazeneca	No		Female	20	Undergraduate	Year 1	Dentistry	No illness	No (Please go to Question 17)
Yes, only first dose	Covishield/Astrazeneca	No		Male	23	Undergraduate	Year 3	Medicine	No illness	No (Please go to Question 17)
Yes, only first dose	Covishield/Astrazeneca	Yes, tested positive (RT-PCR)	Between 1st dose and 2nd dose of vaccination	Female	19	Undergraduate	Year 1	Dentistry	Obesity;Autoimmune diseases	No (Please go to Question 17)
Yes, only first dose	Covishield/Astrazeneca	No		Female	19	Undergraduate		Dentistry	No illness	No (Please go to Question 17)
Not yet (PLEASE DISCONTINUE THE SURVEY)
Not yet (PLEASE DISCONTINUE THE SURVEY)
Yes, 1st and 2nd doses	Covishield/Astrazeneca	No		Female	19	Undergraduate	Year 1	Dentistry	No illness	No (Please go to Question 17)
Yes, 1st and 2nd doses	Covishield/Astrazeneca	No		Female	22	Undergraduate	CRRI/Intern	Dentistry	No illness	No (Please go to Question 17)
Yes, only first dose	Covishield/Astrazeneca	No		Female	19	Undergraduate	Year 1	Dentistry	No illness	No (Please go to Question 17)
Yes, only first dose	Covishield/Astrazeneca	No		Female	20	Undergraduate		Dentistry	No illness	No (Please go to Question 17)
Yes, 1st and 2nd doses	Covishield/Astrazeneca	No		Female	19 Years	Undergraduate	Year 1	Dentistry	No illness	No (Please go to Question 17)
Yes, 1st and 2nd doses	Covishield/Astrazeneca	No		Female	19	Undergraduate	Year 1	Dentistry	No illness	No (Please go to Question 17)
Yes, 1st and 2nd doses	Covishield/Astrazeneca	No		Female	23	Undergraduate	CRRI/Intern	Dentistry	No illness	No (Please go to Question 17)
Yes, 1st and 2nd doses	Covishield/Astrazeneca	No		Female	18	Undergraduate		Dentistry	No illness	Yes	Mild. I was still able to do most daily activities	No	Mild. I was still able to do most daily activities	Not sure/	No	No	Not sure/	Not sure/	No	No	No	Mild. I was still able to do most daily activities	No	Not sure/	No	No	No	No	Not Experienced	Not Experienced	Not Experienced	Not Experienced	Not Experienced	Not Experienced	Not Experienced	Not Experienced	Not Experienced	Not Experienced	Not Experienced	Not Experienced	Not Experienced	Not Experienced	Not Experienced	Not Experienced	Not Experienced	Not Experienced	That same day	Not Experienced	That same day
Yes, 1st and 2nd doses	Covishield/Astrazeneca	Yes, tested positive (RT-PCR)	Before the 1st dose of vaccination	Male	19	Undergraduate	Year 1	Medicine	No illness	Yes	No	No	Mild. I was still able to do most daily activities	Severe! I had to seek medical attention	No	Moderate. I had to stop my daily activities	No	No		No	No	No	No	No	No	No	No	No	Not Experienced	Not Experienced	Not Experienced	That same day	Not Experienced	That same day	Not Experienced	Not Experienced	Not Experienced	Not Experienced	Not Experienced	Not Experienced	Not Experienced	Not Experienced	Not Experienced	Not Experienced	Not Experienced	Not Experienced	Not Experienced	Not Experienced	That same day
Not yet (PLEASE DISCONTINUE THE SURVEY)
Yes, only first dose	Covishield/Astrazeneca	Yes, tested positive (RT-PCR)	Between 1st dose and 2nd dose of vaccination	Female	18	Undergraduate	Year 1	Dentistry	No illness	No (Please go to Question 17)
Yes, 1st and 2nd doses	Covishield/Astrazeneca	No		Female	22 years	Undergraduate	CRRI/Intern	Dentistry	No illness	No (Please go to Question 17)
Yes, 1st and 2nd doses	Covishield/Astrazeneca	No		Female	19	Undergraduate	Year 2	Dentistry	No illness	No (Please go to Question 17)
Yes, only first dose	Covishield/Astrazeneca	Yes, tested positive (RT-PCR)	Between 1st dose and 2nd dose of vaccination	Female	20	Undergraduate	Year 3	Dentistry	No illness	No (Please go to Question 17)
Yes, 1st and 2nd doses	Covishield/Astrazeneca	Yes, tested positive (RT-PCR)	Between 1st dose and 2nd dose of vaccination	Female	22	Undergraduate	CRRI/Intern	Dentistry	No illness	Yes	Mild. I was still able to do most daily activities	Mild. I was still able to do most daily activities	Mild. I was still able to do most daily activities	Mild. I was still able to do most daily activities	No	Not sure/	Not sure/	No	No	No	No	No	No	No	No	No	No	No	1-3 days after	1-3 days after	1-3 days after	1-3 days after	Not Experienced	1-3 days after	1-3 days after	Not Experienced	Not Experienced	Not Experienced	Not Experienced	Not Experienced	Not Experienced	Not Experienced	Not Experienced	Not Experienced	Not Experienced	Not Experienced	1-3 days	1-3 days	1-3 days
Yes, 1st and 2nd doses	Covishield/Astrazeneca	No		Female	18	Undergraduate		Dentistry	No illness	Yes	Mild. I was still able to do most daily activities	No	Mild. I was still able to do most daily activities	No	No	Mild. I was still able to do most daily activities	No	No	No	No	No	No	No	No	No	No	No	No	That same day	Not Experienced	That same day	Not Experienced	Not Experienced	Not Experienced	Not Experienced	Not Experienced	Not Experienced	Not Experienced	Not Experienced	Not Experienced	Not Experienced	Not Experienced	Not Experienced	Not Experienced	Not Experienced	Not Experienced	4-7 days	Not Experienced	That same day
Yes, 1st and 2nd doses	Covishield/Astrazeneca	No		Female	22	Undergraduate	CRRI/Intern	Dentistry	No illness	Yes	Mild. I was still able to do most daily activities	No	No	Mild. I was still able to do most daily activities	No	No	No	No	No	No	No	Mild. I was still able to do most daily activities	No	No	No	No	No	No	That same day	Not Experienced	Not Experienced	That same day	Not Experienced	Not Experienced	Not Experienced	Not Experienced	Not Experienced	Not Experienced	Not Experienced	That same day	Not Experienced	Not Experienced	Not Experienced	Not Experienced	Not Experienced	Not Experienced	1-3 days	Not Experienced	Not Experienced
Not yet (PLEASE DISCONTINUE THE SURVEY)
Not yet (PLEASE DISCONTINUE THE SURVEY)
Not yet (PLEASE DISCONTINUE THE SURVEY)
Not yet (PLEASE DISCONTINUE THE SURVEY)
Yes, only first dose	Covishield/Astrazeneca	No		Male	21	Undergraduate	Year 2	Dentistry		No (Please go to Question 17)
Yes, 1st and 2nd doses	Covishield/Astrazeneca	No		Female	21	Undergraduate	CRRI/Intern	Dentistry	No illness	No (Please go to Question 17)
Yes, 1st and 2nd doses	Covishield/Astrazeneca	No		Female	18	Undergraduate	Year 1	Dentistry	No illness	No (Please go to Question 17)
Not yet (PLEASE DISCONTINUE THE SURVEY)
Yes, only first dose	Covishield/Astrazeneca	Yes, tested positive (RT-PCR)	Between 1st dose and 2nd dose of vaccination	Female	20	Undergraduate	Year 2	Dentistry	No illness	Yes			Severe! I had to seek medical attention	Severe! I had to seek medical attention		Severe! I had to seek medical attention															1-3 days after	1-3 days after																	1-3 days
Yes, 1st and 2nd doses	Covishield/Astrazeneca	Yes, tested positive (CT)	Between 1st dose and 2nd dose of vaccination	Male	19	Undergraduate	Year 2	Dentistry	Autoimmune diseases	No (Please go to Question 17)
Not yet (PLEASE DISCONTINUE THE SURVEY)
Yes, 1st and 2nd doses	Covishield/Astrazeneca	Yes, tested positive (RT-PCR)	After the 2nd dose of vaccination	Female	22	Undergraduate	CRRI/Intern	Dentistry	No illness	Yes	Mild. I was still able to do most daily activities	Moderate. I had to stop my daily activities	Mild. I was still able to do most daily activities	Moderate. I had to stop my daily activities	No	Moderate. I had to stop my daily activities	Moderate. I had to stop my daily activities	No	No	No	No	No	No	No	No	No	No	No	1-3 days after	1-3 days after	Not Experienced	1-3 days after	Not Experienced	1-3 days after	1-3 days after	Not Experienced	Not Experienced	Not Experienced	Not Experienced	Not Experienced	Not Experienced	Not Experienced	Not Experienced	Not Experienced	Not Experienced	Not Experienced	1-3 days	1-3 days	Not Experienced
Yes, 1st and 2nd doses	Covishield/Astrazeneca	No		Female	20	Undergraduate	Year 3	Dentistry		Yes			Severe! I had to seek medical attention	Severe! I had to seek medical attention		Moderate. I had to stop my daily activities	Moderate. I had to stop my daily activities					Severe! I had to seek medical attention							That same day		That same day	That same day		That same day	That same day					That same day							1-3 days	1-3 days	1-3 days
Not yet (PLEASE DISCONTINUE THE SURVEY)
Not yet (PLEASE DISCONTINUE THE SURVEY)
Yes, only first dose	Covaxin (India)	No		Female	18	Undergraduate	Year 1	Dentistry	No illness	No (Please go to Question 17)
Yes, 1st and 2nd doses	Covishield/Astrazeneca	No		Male	18	Undergraduate	Year 1	Dentistry	No illness	No (Please go to Question 17)
Yes, only first dose	Covaxin (India)	No		Female	18	Undergraduate		Dentistry	No illness	No (Please go to Question 17)
Yes, 1st and 2nd doses	Covishield/Astrazeneca	No		Female	20	Undergraduate	Year 1	Dentistry	No illness	Yes	Moderate. I had to stop my daily activities	Moderate. I had to stop my daily activities	Mild. I was still able to do most daily activities	Moderate. I had to stop my daily activities	No	Moderate. I had to stop my daily activities	No	No	No	No	No	No	No	No	No	No	No	No	That same day	That same day	Not Experienced	1-3 days after	Not Experienced	That same day	Not Experienced	Not Experienced	Not Experienced	Not Experienced	Not Experienced	Not Experienced	Not Experienced	Not Experienced	Not Experienced	Not Experienced	Not Experienced	Not Experienced	1-3 days	1-3 days	Not Experienced
Yes, only first dose	Covishield/Astrazeneca	Yes, tested positive (RT-PCR)	Before the 1st dose of vaccination	Female	18	Undergraduate	Year 1	Dentistry	No illness	No (Please go to Question 17)
Yes, 1st and 2nd doses	Covishield/Astrazeneca	No		Female	19	Undergraduate	Year 1	Dentistry		Yes	Moderate. I had to stop my daily activities	Moderate. I had to stop my daily activities	Mild. I was still able to do most daily activities	Not sure/	Not sure/	Moderate. I had to stop my daily activities	Moderate. I had to stop my daily activities	Not sure/	Not sure/	Not sure/	Not sure/	Mild. I was still able to do most daily activities	Not sure/	Mild. I was still able to do most daily activities					That same day	1-3 days after	1-3 days after	1-3 days after	1-3 days after	1-3 days after	1-3 days after	1-3 days after	1-3 days after	1-3 days after	1-3 days after	1-3 days after	1-3 days after	1-3 days after	1-3 days after	1-3 days after	1-3 days after	1-3 days after	1-3 days	1-3 days	1-3 days
Yes, 1st and 2nd doses	Covaxin (India)	Yes, tested positive (CT)	Before the 1st dose of vaccination	Male	18	Undergraduate	Year 1	Dentistry	Obesity	Yes	Moderate. I had to stop my daily activities	Moderate. I had to stop my daily activities	Moderate. I had to stop my daily activities	Moderate. I had to stop my daily activities	Severe! I had to seek medical attention	Moderate. I had to stop my daily activities	Mild. I was still able to do most daily activities	Severe! I had to seek medical attention	Severe! I had to seek medical attention	Severe! I had to seek medical attention	Severe! I had to seek medical attention	Severe! I had to seek medical attention	Severe! I had to seek medical attention	Severe! I had to seek medical attention	Severe! I had to seek medical attention	Severe! I had to seek medical attention	Severe! I had to seek medical attention	Severe! I had to seek medical attention	1-3 days after	1-3 days after	1-3 days after	1-3 days after	That same day	1-3 days after	1-3 days after	That same day	That same day	That same day	That same day	That same day	That same day	That same day	That same day	That same day	That same day	That same day	1-3 days	1-3 days	1-3 days
Not yet (PLEASE DISCONTINUE THE SURVEY)
Yes, 1st and 2nd doses	Covishield/Astrazeneca	Yes, tested positive (RT-PCR)	Between 1st dose and 2nd dose of vaccination	Female	19	Undergraduate	Year 1	Dentistry	No illness	Yes	Moderate. I had to stop my daily activities	Mild. I was still able to do most daily activities	Severe! I had to seek medical attention	Moderate. I had to stop my daily activities	No	Severe! I had to seek medical attention	Mild. I was still able to do most daily activities	No	No	No	No	Severe! I had to seek medical attention	No	No	No	No	No	No	That same day	1-3 days after	1-3 days after	That same day	Not Experienced	1-3 days after	1-3 days after	Not Experienced	4-7 days after	Not Experienced	Not Experienced	Not Experienced	Not Experienced	Not Experienced	Not Experienced	Not Experienced	Not Experienced	Not Experienced	1-3 days	1-3 days	1-3 days
Not yet (PLEASE DISCONTINUE THE SURVEY)
Yes, only first dose	Covaxin (India)	No		Female	18	Undergraduate		Dentistry	No illness	No (Please go to Question 17)
Not yet (PLEASE DISCONTINUE THE SURVEY)
Not yet (PLEASE DISCONTINUE THE SURVEY)
Not yet (PLEASE DISCONTINUE THE SURVEY)
Yes, 1st and 2nd doses	Covishield/Astrazeneca	No		Female	19	Undergraduate	Year 2	Dentistry	No illness	No (Please go to Question 17)
Yes, 1st and 2nd doses	Covishield/Astrazeneca	No		Female	19	Undergraduate	Year 2	Dentistry	No illness	No (Please go to Question 17)
Yes, only first dose	Covaxin (India)	Yes, tested positive (RT-PCR)	Between 1st dose and 2nd dose of vaccination	Male	20	Undergraduate	Year 2	Medicine	No illness	No (Please go to Question 17)
Yes, 1st and 2nd doses	Covaxin (India)	No		Female	19	Undergraduate	Year 1	Dentistry	No illness	Yes	Mild. I was still able to do most daily activities	Mild. I was still able to do most daily activities	Mild. I was still able to do most daily activities	No	No	Mild. I was still able to do most daily activities	No	No	No	No	No	Mild. I was still able to do most daily activities	No	No	No	No	No	No	1-3 days after	1-3 days after	1-3 days after	Not Experienced	Not Experienced	1-3 days after	Not Experienced	Not Experienced	Not Experienced	Not Experienced	Not Experienced	1-3 days after	Not Experienced	Not Experienced	Not Experienced	Not Experienced	Not Experienced	Not Experienced	1-3 days	1-3 days	1-3 days
Yes, 1st and 2nd doses	Covishield/Astrazeneca	Yes, tested positive (CT)	Before the 1st dose of vaccination	Female	22	Undergraduate	CRRI/Intern	Physiotherapy	No illness	Yes	Mild. I was still able to do most daily activities	Mild. I was still able to do most daily activities	Mild. I was still able to do most daily activities	No	No	Mild. I was still able to do most daily activities	Mild. I was still able to do most daily activities	No	No	No	No	No	No	No	Mild. I was still able to do most daily activities	Mild. I was still able to do most daily activities	No	No	1-3 days after	1-3 days after	1-3 days after	Not Experienced	Not Experienced	1-3 days after	1-3 days after	Not Experienced	Not Experienced	Not Experienced	Not Experienced	Not Experienced	Not Experienced	Not Experienced	1-3 days after	1-3 days after	Not Experienced	Not Experienced	That same day	That same day	That same day
Yes, 1st and 2nd doses	Covishield/Astrazeneca	No		Female	22 years	Undergraduate	CRRI/Intern	Physiotherapy	No illness	Yes	Mild. I was still able to do most daily activities	Mild. I was still able to do most daily activities		Severe! I had to seek medical attention		Mild. I was still able to do most daily activities	Mild. I was still able to do most daily activities									Mild. I was still able to do most daily activities			That same day	That same day		4-7 days after		4-7 days after	4-7 days after									4-7 days after			1-3 days	1-3 days
Yes, 1st and 2nd doses	Covaxin (India)	No		Female	19	Undergraduate	Year 1	Dentistry	No illness	Yes	Mild. I was still able to do most daily activities	Mild. I was still able to do most daily activities	Mild. I was still able to do most daily activities	No	No	Mild. I was still able to do most daily activities	No	No	No	No	No	Mild. I was still able to do most daily activities	No	No	No	No	No	No	1-3 days after	1-3 days after	1-3 days after	Not Experienced	Not Experienced	1-3 days after	Not Experienced	Not Experienced	Not Experienced	Not Experienced	Not Experienced	1-3 days after	Not Experienced	Not Experienced	Not Experienced	Not Experienced	Not Experienced	Not Experienced	1-3 days	1-3 days	1-3 days
Not yet (PLEASE DISCONTINUE THE SURVEY)
Not yet (PLEASE DISCONTINUE THE SURVEY)
Yes, 1st and 2nd doses	Covishield/Astrazeneca	No		Male	18	Undergraduate	Year 1	Dentistry		Yes	Mild. I was still able to do most daily activities	Mild. I was still able to do most daily activities	No	No	No	No	Not sure/	Not sure/	Not sure/		No	No	No	No	No	No	No	No	That same day	1-3 days after	Not Experienced	Not Experienced	4-7 days after	4-7 days after	4-7 days after	4-7 days after	4-7 days after	4-7 days after	4-7 days after	4-7 days after	4-7 days after	4-7 days after	4-7 days after	4-7 days after	4-7 days after	4-7 days after	1-3 days	1-3 days	Not Experienced
Yes, 1st and 2nd doses	Covishield/Astrazeneca	No		Male	18	Undergraduate		Dentistry	No illness	No (Please go to Question 17)
Yes, 1st and 2nd doses	Covishield/Astrazeneca	No		Female	22	Undergraduate	CRRI/Intern	Dentistry	No illness	Yes	Mild. I was still able to do most daily activities	Mild. I was still able to do most daily activities	Mild. I was still able to do most daily activities	Not sure/	Not sure/	Not sure/	Not sure/	Not sure/	Not sure/	Not sure/	Not sure/	Mild. I was still able to do most daily activities	Not sure/	Not sure/	Not sure/	Not sure/	Not sure/	Not sure/	That same day	That same day	Not Experienced	Not Experienced	Not Experienced	Not Experienced	Not Experienced	Not Experienced	Not Experienced	Not Experienced	Not Experienced	1-3 days after	Not Experienced	Not Experienced	Not Experienced	Not Experienced	Not Experienced		1-3 days	1-3 days	Not Experienced
Yes, 1st and 2nd doses	Covishield/Astrazeneca	No		Female	21	Undergraduate		Dentistry	No illness	Yes	Mild. I was still able to do most daily activities	No	Mild. I was still able to do most daily activities	Mild. I was still able to do most daily activities	No	Mild. I was still able to do most daily activities													That same day		That same day	That same day															1-3 days		1-3 days
Yes, 1st and 2nd doses	Covishield/Astrazeneca	No		Female	21	Undergraduate	Yea 4	Dentistry	No illness	No (Please go to Question 17)
Yes, only first dose	Covishield/Astrazeneca	No		Female	19	Undergraduate	Year 1	Dentistry	No illness	No (Please go to Question 17)
Yes, only first dose	Covishield/Astrazeneca	No		Female	22	Undergraduate	Year 3	Dentistry	No illness	No (Please go to Question 17)
Yes, only first dose	Covishield/Astrazeneca	No		Female	23	Undergraduate	CRRI/Intern	Dentistry	No illness	No (Please go to Question 17)
Not yet (PLEASE DISCONTINUE THE SURVEY)
Not yet (PLEASE DISCONTINUE THE SURVEY)
Yes, 1st and 2nd doses	Covishield/Astrazeneca	No		Female	17	Undergraduate	Year 1	Dentistry	No illness	Yes						Mild. I was still able to do most daily activities												Mild. I was still able to do most daily activities						That same day												That same day
Yes, 1st and 2nd doses	Covishield/Astrazeneca	No		Male	21	Undergraduate	Year 1	Medicine	No illness	Yes	Mild. I was still able to do most daily activities	Mild. I was still able to do most daily activities	Moderate. I had to stop my daily activities	No	No	Mild. I was still able to do most daily activities	Mild. I was still able to do most daily activities	Not sure/	Not sure/	Not sure/	Not sure/	Not sure/	Not sure/	Not sure/	Not sure/	Not sure/	Not sure/	Not sure/	That same day	That same day	That same day	Not Experienced	Not Experienced	Not Experienced	That same day	Not Experienced	Not Experienced	Not Experienced	Not Experienced	Not Experienced	Not Experienced	Not Experienced	Not Experienced	Not Experienced	Not Experienced	Not Experienced	1-3 days	That same day	That same day
Yes, 1st and 2nd doses	Covishield/Astrazeneca	No		Female	18	Undergraduate	Year 1	Dentistry	No illness	Yes	Mild. I was still able to do most daily activities	Mild. I was still able to do most daily activities	Mild. I was still able to do most daily activities	No	No	Mild. I was still able to do most daily activities	Mild. I was still able to do most daily activities	No	Not sure/	No		No	No	No	No	No	Mild. I was still able to do most daily activities	No	That same day	That same day	That same day	Not Experienced	Not Experienced	That same day	Not Experienced	Not Experienced	Not Experienced	Not Experienced	Not Experienced	Not Experienced	Not Experienced	Not Experienced	Not Experienced	Not Experienced	That same day	Not Experienced	1-3 days	1-3 days	That same day
Yes, 1st and 2nd doses	Covishield/Astrazeneca	No		Male	22	Undergraduate	Year 1	Medicine	Hypertension	No (Please go to Question 17)
Yes, only first dose	Covaxin (India)	No		Female	19	Undergraduate	Year 2	Dentistry	No illness	No (Please go to Question 17)
Yes, 1st and 2nd doses	Covishield/Astrazeneca	No		Female	17	Undergraduate		Dentistry	No illness	Yes						Mild. I was still able to do most daily activities												Mild. I was still able to do most daily activities						That same day												That same day
Yes, only first dose	Covishield/Astrazeneca	No	Between 1st dose and 2nd dose of vaccination	Female	19	Undergraduate		Medicine	No illness	No (Please go to Question 17)
Yes, only first dose	Covishield/Astrazeneca	No	Between 1st dose and 2nd dose of vaccination	Female	19	Undergraduate		Medicine	No illness	No (Please go to Question 17)
Yes, only first dose	Covishield/Astrazeneca	No		Female	19	Undergraduate	Year 2	Dentistry	No illness	No (Please go to Question 17)
Yes, only first dose	Covishield/Astrazeneca	No		Female	19	Undergraduate	Year 2	Dentistry	No illness	No (Please go to Question 17)
Yes, 1st and 2nd doses	Covishield/Astrazeneca	No		Female	17	Undergraduate	Year 1	Dentistry	No illness	Yes						Mild. I was still able to do most daily activities												Mild. I was still able to do most daily activities						That same day												That same day
Yes, 1st and 2nd doses	Covishield/Astrazeneca	Yes, tested positive (RT-PCR)	After the 2nd dose of vaccination	Male	29	Postgraduate	Year 1	Medicine	No illness	Yes			Mild. I was still able to do most daily activities																		That same day																		1-3 days
Yes, only first dose	Covishield/Astrazeneca	No		Female	32	Postgraduate	Year 2	Pharmacy	No illness	Yes			Severe! I had to seek medical attention	Severe! I had to seek medical attention		Severe! I had to seek medical attention		Severe! I had to seek medical attention											1-3 days after		1-3 days after	1-3 days after															Not Experienced	Not Experienced
Yes, only first dose	Covishield/Astrazeneca	No		Female	20	Undergraduate	Year 2	Dentistry	No illness	No (Please go to Question 17)
Yes, 1st and 2nd doses	Covishield/Astrazeneca	No		Female	21	Undergraduate	CRRI/Intern	Dentistry	No illness	No (Please go to Question 17)
Yes, 1st and 2nd doses	Covishield/Astrazeneca	No		Female	17	Undergraduate	Year 1	Dentistry	No illness	Yes						Mild. I was still able to do most daily activities												Mild. I was still able to do most daily activities						That same day												That same day
Yes, 1st and 2nd doses	Covishield/Astrazeneca	Yes, tested positive (RT-PCR)	After the 2nd dose of vaccination	Female	20	Undergraduate	Year 2	Dentistry	No illness	Yes	Moderate. I had to stop my daily activities	Mild. I was still able to do most daily activities	Severe! I had to seek medical attention	No	No	Moderate. I had to stop my daily activities	Severe! I had to seek medical attention	No	No	No	No	Moderate. I had to stop my daily activities	No	No	No	No	No	No	That same day	That same day	That same day	Not Experienced	Not Experienced	Not Experienced	That same day	Not Experienced	Not Experienced	Not Experienced	Not Experienced		Not Experienced	Not Experienced	Not Experienced	Not Experienced	Not Experienced	Not Experienced	1-3 days	1-3 days	1-3 days
Yes, only first dose	Covishield/Astrazeneca	No		Female	19	Undergraduate	Year 1	Dentistry	No illness	Yes	Moderate. I had to stop my daily activities	Severe! I had to seek medical attention	Severe! I had to seek medical attention	Moderate. I had to stop my daily activities		Severe! I had to seek medical attention	Moderate. I had to stop my daily activities					Severe! I had to seek medical attention			Moderate. I had to stop my daily activities		Moderate. I had to stop my daily activities	Moderate. I had to stop my daily activities	That same day	That same day	That same day	That same day	That same day	That same day	That same day	That same day	That same day	That same day	That same day	That same day	That same day	That same day	That same day		That same day		1-3 days	1-3 days
Yes, only first dose	Covishield/Astrazeneca	No		Male	21	Undergraduate	Year 1	Dentistry	No illness	No (Please go to Question 17)
Yes, only first dose	Covaxin (India)	No		Male	24	Undergraduate	Year 1	Dentistry	No illness	No (Please go to Question 17)
Yes, only first dose	Covishield/Astrazeneca	No		Male	22	Undergraduate	Year 1	Dentistry	No illness	No (Please go to Question 17)
Yes, only first dose	Covishield/Astrazeneca	No		Male	20	Undergraduate	Year 1	Dentistry	No illness	No (Please go to Question 17)
Yes, only first dose	Covishield/Astrazeneca	No		Male	20 years	Undergraduate	Year 1	Dentistry	No illness	Yes	Severe! I had to seek medical attention		Severe! I had to seek medical attention	Severe! I had to seek medical attention		Severe! I had to seek medical attention	Severe! I had to seek medical attention												That same day		That same day	That same day		That same day	That same day												That same day		1-3 days
Yes, only first dose	Covishield/Astrazeneca	No		Male	21	Undergraduate	Year 2	Dentistry	No illness	Yes			Moderate. I had to stop my daily activities	Moderate. I had to stop my daily activities		Moderate. I had to stop my daily activities															That same day	That same day		That same day															That same day
Yes, only first dose	Covishield/Astrazeneca	No		Female	20	Undergraduate	Year 2	Dentistry	No illness	No (Please go to Question 17)
Yes, only first dose	Covishield/Astrazeneca	No		Female	20	Undergraduate	Year 2	Dentistry	No illness	Yes	Moderate. I had to stop my daily activities		Mild. I was still able to do most daily activities	No	No	Moderate. I had to stop my daily activities	Moderate. I had to stop my daily activities	No	No	No	No	Mild. I was still able to do most daily activities	No	No	No	No	Moderate. I had to stop my daily activities	No	That same day	Not Experienced	That same day	Not Experienced	Not Experienced	That same day	That same day	Not Experienced	Not Experienced	Not Experienced	Not Experienced	1-3 days after	Not Experienced	Not Experienced	Not Experienced	Not Experienced	Not Experienced	Not Experienced	That same day	Still present	Still present
Yes, only first dose	Covishield/Astrazeneca	No		Female	19	Undergraduate	Year 2	Dentistry		No (Please go to Question 17)
Yes, only first dose	Covishield/Astrazeneca	Yes, tested positive (RT-PCR)	Before the 1st dose of vaccination	Female	21	Undergraduate	Year 2	Dentistry	No illness	Yes	Mild. I was still able to do most daily activities	No	Mild. I was still able to do most daily activities		No	No	No	No	No	No		No	No	No	No	No	No	No	1-3 days after	Not Experienced	1-3 days after	1-3 days after	Not Experienced	Not Experienced	Not Experienced	Not Experienced	Not Experienced	Not Experienced	Not Experienced	Not Experienced	Not Experienced	Not Experienced	Not Experienced	Not Experienced	Not Experienced	Not Experienced	1-3 days	Not Experienced	1-3 days
Yes, only first dose	Covishield/Astrazeneca	No		Female	20	Undergraduate	Year 2	Dentistry	No illness	No (Please go to Question 17)
Yes, only first dose	Covishield/Astrazeneca	No		Female	23	Undergraduate	Year 2	Dentistry	No illness	No (Please go to Question 17)
Yes, only first dose	Covishield/Astrazeneca	No	Before the 1st dose of vaccination	Female	20	Undergraduate	Year 3	Dentistry	No illness	Yes				Mild. I was still able to do most daily activities		Mild. I was still able to do most daily activities	Mild. I was still able to do most daily activities
Yes, only first dose	Covishield/Astrazeneca	Yes, tested positive (RT-PCR)	Between 1st dose and 2nd dose of vaccination	Female	21	Undergraduate		Dentistry	No illness	No (Please go to Question 17)
Yes, only first dose	Covishield/Astrazeneca	No		Female	21	Undergraduate	Year 3	Dentistry	No illness	Yes	Mild. I was still able to do most daily activities	Mild. I was still able to do most daily activities				Mild. I was still able to do most daily activities	Mild. I was still able to do most daily activities												1-3 days after	1-3 days after				That same day	1-3 days after												1-3 days	1-3 days
Yes, only first dose	Covishield/Astrazeneca	No		Male	21	Undergraduate		Dentistry	No illness	No (Please go to Question 17)
Yes, only first dose	Covishield/Astrazeneca	No		Male	22	Undergraduate	Year 3	Dentistry	No illness	No (Please go to Question 17)
Yes, only first dose	Covishield/Astrazeneca	Yes, never tested (symptomatic)	Before the 1st dose of vaccination	Male	23	Undergraduate	Yea 4	Dentistry	No illness	Yes	Mild. I was still able to do most daily activities	Mild. I was still able to do most daily activities	Mild. I was still able to do most daily activities	Mild. I was still able to do most daily activities	Not sure/	Mild. I was still able to do most daily activities	Not sure/	Mild. I was still able to do most daily activities	Not sure/	Not sure/	Not sure/	Not sure/	Not sure/	Mild. I was still able to do most daily activities	Not sure/	Not sure/	Not sure/	Not sure/	That same day	Not Experienced	1-3 days after	Not Experienced	Not Experienced	1-3 days after	Not Experienced	1-3 days after	Not Experienced	Not Experienced	Not Experienced	Not Experienced	Not Experienced	1-3 days after	Not Experienced	Not Experienced	Not Experienced	Not Experienced	1-3 days	1-3 days	1-3 days
Yes, only first dose	Covishield/Astrazeneca	Yes, never tested (symptomatic)	Before the 1st dose of vaccination	Male	23	Undergraduate		Dentistry	No illness	Yes	Mild. I was still able to do most daily activities	Mild. I was still able to do most daily activities	Mild. I was still able to do most daily activities	Mild. I was still able to do most daily activities	Not sure/	Mild. I was still able to do most daily activities	Not sure/	Mild. I was still able to do most daily activities	Not sure/	Not sure/	Not sure/	Not sure/	Not sure/	Mild. I was still able to do most daily activities	Not sure/	Not sure/	Not sure/	Not sure/	That same day	Not Experienced	1-3 days after	Not Experienced	Not Experienced	1-3 days after	Not Experienced	1-3 days after	Not Experienced	Not Experienced	Not Experienced	Not Experienced	Not Experienced	1-3 days after	Not Experienced	Not Experienced	Not Experienced	Not Experienced	1-3 days	1-3 days	1-3 days
Yes, only first dose	Covishield/Astrazeneca	No		Male	20	Undergraduate	Year 3	Dentistry	No illness	Yes	Mild. I was still able to do most daily activities	Mild. I was still able to do most daily activities	Moderate. I had to stop my daily activities	Mild. I was still able to do most daily activities	Mild. I was still able to do most daily activities	Moderate. I had to stop my daily activities		Moderate. I had to stop my daily activities	Moderate. I had to stop my daily activities	Moderate. I had to stop my daily activities	Moderate. I had to stop my daily activities	Mild. I was still able to do most daily activities					Mild. I was still able to do most daily activities		That same day	That same day	That same day	That same day		That same day	That same day	1-3 days after											1-3 days	1-3 days	1-3 days
Yes, only first dose	Covishield/Astrazeneca	No		Female	22	Undergraduate	Yea 4	Dentistry	No illness	Yes	Moderate. I had to stop my daily activities			Mild. I was still able to do most daily activities															That same day			That same day															1-3 days
Yes, only first dose	Covishield/Astrazeneca	No		Male	22	Undergraduate		Dentistry	No illness	No (Please go to Question 17)
Yes, only first dose	Covishield/Astrazeneca	No		Female	21	Undergraduate	Year 3	Dentistry	No illness	No (Please go to Question 17)
Yes, only first dose	Covishield/Astrazeneca	No		Female	21	Undergraduate	Year 3	Dentistry	No illness	No (Please go to Question 17)
Yes, only first dose	Covishield/Astrazeneca	No	Between 1st dose and 2nd dose of vaccination	Male	23	Undergraduate		Dentistry	Obesity	Yes	Mild. I was still able to do most daily activities	Mild. I was still able to do most daily activities	Mild. I was still able to do most daily activities	Mild. I was still able to do most daily activities		Mild. I was still able to do most daily activities													That same day	That same day	That same day	That same day		That same day													That same day	That same day
Yes, only first dose	Covishield/Astrazeneca	No		Male	21	Undergraduate	Year 3	Dentistry	No illness	No (Please go to Question 17)
Yes, only first dose	Covishield/Astrazeneca	No		Female	21	Undergraduate	Yea 4	Dentistry	No illness	No (Please go to Question 17)
Yes, only first dose	Covishield/Astrazeneca	No		Female	20	Undergraduate	Year 3	Dentistry	No illness	No (Please go to Question 17)
Yes, only first dose	Covishield/Astrazeneca	Yes, never tested (symptomatic)		Female	24	Undergraduate	Yea 4	Dentistry	No illness	No (Please go to Question 17)
Yes, only first dose	Covishield/Astrazeneca	No		Male	20	Undergraduate	Year 3	Dentistry	No illness	No (Please go to Question 17)
Yes, only first dose	Covishield/Astrazeneca	No		Male	19	Undergraduate	Year 2	Dentistry	No illness	No (Please go to Question 17)
Yes, only first dose	Covishield/Astrazeneca	No		Male	22	Undergraduate	Year 2	Dentistry	No illness	No (Please go to Question 17)
Yes, only first dose	Covishield/Astrazeneca	Yes, never tested (symptomatic)		Female	21	Undergraduate	Year 2	Dentistry	No illness	No (Please go to Question 17)
Yes, only first dose	Covishield/Astrazeneca	No	Between 1st dose and 2nd dose of vaccination	Male	23	Undergraduate	Year 1	Dentistry	Obesity	Yes	Mild. I was still able to do most daily activities	Mild. I was still able to do most daily activities	Mild. I was still able to do most daily activities	Mild. I was still able to do most daily activities		Mild. I was still able to do most daily activities													That same day	That same day	That same day	That same day		That same day													That same day	That same day
Yes, only first dose	Covishield/Astrazeneca	No		Male	21	Undergraduate	Year 1	Dentistry	No illness	No (Please go to Question 17)
Yes, only first dose	Covishield/Astrazeneca	No		Female	21	Undergraduate	Year 1	Dentistry	No illness	No (Please go to Question 17)
Yes, only first dose	Covishield/Astrazeneca	No		Female	20	Undergraduate	Year 1	Dentistry	No illness	No (Please go to Question 17)
Yes, only first dose	Covishield/Astrazeneca	No		Female	24	Undergraduate	Year 1	Dentistry	No illness	No (Please go to Question 17)
[truncated: 28 more columns]
